# Supplementary material
Source: publisher site journal article supplement (https://study.sagepub.com/system/files/appendices.zip)
Supplement: Supplementary file 1 [file appendices.zip]

# ONLINE APPENDIX D: STATISTICAL TABLES

## 1 Areas under the standard normal curve

Table 1 provides details of the proportion of the area under the standard normal curve lying in the body below and in the tail beyond particular  $z$ -scores. The table can be used either to identify probability levels associated with particular  $z$ -scores or to identify  $z$ -scores associated with particular probabilities.

For example, to find out the probability of events associated with a  $z$ -score greater than 1.46, look for 1.46 in the left-hand column of the table labelled ' $z$ ' and read off the area that lies in the tail beyond that  $z$ -score in the adjacent column. In this case the value is .072. This means that 1.46 cuts off  $.072 \times 100\%$  of the total area. In other words, 7.2% of scores will be greater (and 92.8% will be equal to or less) than 1.46 standard deviations above the mean.

On the other hand, to find out what  $z$ -value has to be exceeded to cut off 5% of the area, look for the first value that is equal to, or is less than, .05 in the column labelled 'Area in tail beyond  $z$ ' and read off the associated  $z$ -score. In this case the required value is 1.65. This means that in order to cut off 5% or less of the population, a  $z$ -score has to be greater than or equal to 1.65. The value for a two-tailed test would be the value that cuts off .025 (i.e.  $.05/2$ ) of the population in each tail. The corresponding value of  $z$  is 1.96.

Table 1 Areas under the standard normal curve

| $z$  | Area in body below $z$ | Area in tail beyond $z$ | $z$  | Area in body below $z$ | Area in tail beyond $z$ | $z$  | Area in body below $z$ | Area in tail beyond $z$ |
|------|------------------------|-------------------------|------|------------------------|-------------------------|------|------------------------|-------------------------|
| 0.00 | .500                   | .500                    | 0.38 | .648                   | .352                    | 0.76 | .776                   | .224                    |
| 0.01 | .504                   | .496                    | 0.39 | .652                   | .348                    | 0.77 | .779                   | .221                    |
| 0.02 | .508                   | .492                    | 0.40 | .655                   | .345                    | 0.78 | .782                   | .218                    |
| 0.03 | .512                   | .488                    | 0.41 | .659                   | .341                    | 0.79 | .785                   | .215                    |
| 0.04 | .516                   | .484                    | 0.42 | .663                   | .337                    | 0.80 | .788                   | .212                    |
| 0.05 | .520                   | .480                    | 0.43 | .666                   | .334                    | 0.81 | .791                   | .209                    |
| 0.06 | .524                   | .476                    | 0.44 | .670                   | .330                    | 0.82 | .794                   | .206                    |
| 0.07 | .528                   | .472                    | 0.45 | .674                   | .326                    | 0.83 | .797                   | .203                    |
| 0.08 | .532                   | .468                    | 0.46 | .677                   | .323                    | 0.84 | .800                   | .200                    |
| 0.09 | .536                   | .464                    | 0.47 | .681                   | .319                    | 0.85 | .802                   | .198                    |
| 0.10 | .540                   | .460                    | 0.48 | .684                   | .316                    | 0.86 | .805                   | .195                    |
| 0.11 | .544                   | .456                    | 0.49 | .688                   | .312                    | 0.87 | .808                   | .192                    |
| 0.12 | .548                   | .452                    | 0.50 | .691                   | .309                    | 0.88 | .811                   | .189                    |
| 0.13 | .552                   | .448                    | 0.51 | .695                   | .305                    | 0.89 | .813                   | .187                    |
| 0.14 | .556                   | .444                    | 0.52 | .698                   | .302                    | 0.90 | .816                   | .184                    |

Statistical Tables 2

|      |      |      |      |      |      |      |      |      |
|------|------|------|------|------|------|------|------|------|
| 0.15 | .560 | .440 | 0.53 | .702 | .298 | 0.91 | .819 | .181 |
| 0.16 | .564 | .436 | 0.54 | .705 | .295 | 0.92 | .821 | .179 |
| 0.17 | .567 | .433 | 0.55 | .709 | .291 | 0.93 | .824 | .176 |
| 0.18 | .571 | .429 | 0.56 | .712 | .288 | 0.94 | .826 | .174 |
| 0.19 | .575 | .425 | 0.57 | .716 | .284 | 0.95 | .829 | .171 |
| 0.20 | .579 | .421 | 0.58 | .719 | .281 | 0.96 | .831 | .169 |
| 0.21 | .583 | .417 | 0.59 | .722 | .278 | 0.97 | .834 | .166 |
| 0.22 | .587 | .413 | 0.60 | .726 | .274 | 0.98 | .836 | .164 |
| 0.23 | .591 | .409 | 0.61 | .729 | .271 | 0.99 | .839 | .161 |
| 0.24 | .595 | .405 | 0.62 | .732 | .268 | 1.00 | .841 | .159 |
| 0.25 | .599 | .401 | 0.63 | .736 | .264 | 1.01 | .844 | .156 |
| 0.26 | .603 | .397 | 0.64 | .739 | .261 | 1.02 | .846 | .154 |
| 0.27 | .606 | .394 | 0.65 | .742 | .258 | 1.03 | .848 | .152 |
| 0.28 | .610 | .390 | 0.66 | .745 | .255 | 1.04 | .851 | .149 |
| 0.29 | .614 | .386 | 0.67 | .749 | .251 | 1.05 | .853 | .147 |
| 0.30 | .618 | .382 | 0.68 | .752 | .248 | 1.06 | .855 | .145 |
| 0.31 | .622 | .378 | 0.69 | .755 | .245 | 1.07 | .858 | .142 |
| 0.32 | .626 | .374 | 0.70 | .758 | .242 | 1.08 | .860 | .140 |
| 0.33 | .629 | .371 | 0.71 | .761 | .239 | 1.09 | .862 | .138 |
| 0.34 | .633 | .367 | 0.72 | .764 | .236 | 1.10 | .864 | .136 |
| 0.35 | .637 | .363 | 0.73 | .767 | .233 | 1.11 | .867 | .133 |
| 0.36 | .641 | .359 | 0.74 | .770 | .230 | 1.12 | .869 | .131 |
| 0.37 | .644 | .356 | 0.75 | .773 | .227 | 1.13 | .871 | .129 |
| 1.14 | .873 | .127 | 1.64 | .949 | .051 | 2.14 | .984 | .016 |
| 1.15 | .875 | .125 | 1.65 | .951 | .049 | 2.15 | .984 | .016 |
| 1.16 | .877 | .123 | 1.66 | .952 | .048 | 2.16 | .985 | .015 |
| 1.17 | .879 | .121 | 1.67 | .953 | .047 | 2.17 | .985 | .015 |
| 1.18 | .881 | .119 | 1.68 | .954 | .046 | 2.18 | .985 | .015 |
| 1.19 | .883 | .117 | 1.69 | .954 | .046 | 2.19 | .986 | .014 |
| 1.20 | .885 | .115 | 1.70 | .955 | .045 | 2.20 | .986 | .014 |
| 1.21 | .887 | .113 | 1.71 | .956 | .044 | 2.21 | .986 | .014 |
| 1.22 | .889 | .111 | 1.72 | .957 | .043 | 2.22 | .987 | .013 |
| 1.23 | .891 | .109 | 1.73 | .958 | .042 | 2.23 | .987 | .013 |
| 1.24 | .893 | .107 | 1.74 | .959 | .041 | 2.24 | .987 | .013 |
| 1.25 | .894 | .106 | 1.75 | .960 | .040 | 2.25 | .988 | .012 |
| 1.26 | .896 | .104 | 1.76 | .961 | .039 | 2.26 | .988 | .012 |
| 1.27 | .898 | .102 | 1.77 | .962 | .038 | 2.27 | .988 | .012 |
| 1.28 | .900 | .100 | 1.78 | .962 | .038 | 2.28 | .989 | .011 |
| 1.29 | .901 | .099 | 1.79 | .963 | .037 | 2.29 | .989 | .011 |
| 1.30 | .903 | .097 | 1.80 | .964 | .036 | 2.30 | .989 | .011 |
| 1.31 | .905 | .095 | 1.81 | .965 | .035 | 2.31 | .990 | .010 |
| 1.32 | .907 | .093 | 1.82 | .966 | .034 | 2.32 | .990 | .010 |
| 1.33 | .908 | .092 | 1.83 | .966 | .034 | 2.33 | .990 | .010 |
| 1.34 | .910 | .090 | 1.84 | .967 | .033 | 2.34 | .990 | .010 |
| 1.35 | .911 | .089 | 1.85 | .968 | .032 | 2.35 | .991 | .009 |
| 1.36 | .913 | .087 | 1.86 | .969 | .031 | 2.36 | .991 | .009 |
| 1.37 | .915 | .085 | 1.87 | .969 | .031 | 2.37 | .991 | .009 |

|      |      |      |      |      |      |      |      |      |
|------|------|------|------|------|------|------|------|------|
| 1.38 | .916 | .084 | 1.88 | .970 | .030 | 2.38 | .991 | .009 |
| 1.39 | .918 | .082 | 1.89 | .971 | .029 | 2.39 | .992 | .008 |
| 1.40 | .919 | .081 | 1.90 | .971 | .029 | 2.40 | .992 | .008 |
| 1.41 | .921 | .079 | 1.91 | .972 | .028 | 2.41 | .992 | .008 |
| 1.42 | .922 | .078 | 1.92 | .973 | .027 | 2.42 | .992 | .008 |
| 1.43 | .924 | .076 | 1.93 | .973 | .027 | 2.43 | .992 | .008 |
| 1.44 | .925 | .075 | 1.94 | .974 | .026 | 2.44 | .993 | .007 |
| 1.45 | .926 | .074 | 1.95 | .974 | .026 | 2.45 | .993 | .007 |
| 1.46 | .928 | .072 | 1.96 | .975 | .025 | 2.46 | .993 | .007 |
| 1.47 | .929 | .071 | 1.97 | .976 | .024 | 2.47 | .993 | .007 |
| 1.48 | .931 | .069 | 1.98 | .976 | .024 | 2.48 | .993 | .007 |
| 1.49 | .932 | .068 | 1.99 | .977 | .023 | 2.49 | .994 | .006 |
| 1.50 | .933 | .067 | 2.00 | .977 | .023 | 2.50 | .994 | .006 |
| 1.51 | .934 | .066 | 2.01 | .978 | .022 | 2.51 | .994 | .006 |
| 1.52 | .936 | .064 | 2.02 | .978 | .022 | 2.52 | .994 | .006 |
| 1.53 | .937 | .063 | 2.03 | .979 | .021 | 2.53 | .994 | .006 |
| 1.54 | .938 | .062 | 2.04 | .979 | .021 | 2.54 | .994 | .006 |
| 1.55 | .939 | .061 | 2.05 | .980 | .020 | 2.55 | .995 | .005 |
| 1.56 | .941 | .059 | 2.06 | .980 | .020 | 2.56 | .995 | .005 |
| 1.57 | .942 | .058 | 2.07 | .981 | .019 | 2.57 | .995 | .005 |
| 1.58 | .943 | .057 | 2.08 | .981 | .019 | 2.58 | .995 | .005 |
| 1.59 | .944 | .056 | 2.09 | .982 | .018 | 2.59 | .995 | .005 |
| 1.60 | .945 | .055 | 2.10 | .982 | .018 | 2.60 | .995 | .005 |
| 1.61 | .946 | .054 | 2.11 | .983 | .017 | 2.61 | .995 | .005 |
| 1.62 | .947 | .053 | 2.12 | .983 | .017 | 2.62 | .996 | .004 |
| 1.63 | .948 | .052 | 2.13 | .983 | .017 | 2.63 | .996 | .004 |
| 2.64 | .996 | .004 | 2.76 | .997 | .003 | 2.88 | .998 | .002 |
| 2.65 | .996 | .004 | 2.77 | .997 | .003 | 2.89 | .998 | .002 |
| 2.66 | .996 | .004 | 2.78 | .997 | .003 | 2.90 | .998 | .002 |
| 2.67 | .996 | .004 | 2.79 | .997 | .003 | 2.91 | .998 | .002 |
| 2.68 | .996 | .004 | 2.80 | .997 | .003 | 2.92 | .998 | .002 |
| 2.69 | .996 | .004 | 2.81 | .998 | .002 | 2.93 | .998 | .002 |
| 2.70 | .997 | .003 | 2.82 | .998 | .002 | 2.94 | .998 | .002 |
| 2.71 | .997 | .003 | 2.83 | .998 | .002 | 2.95 | .998 | .002 |
| 2.72 | .997 | .003 | 2.84 | .998 | .002 | 2.96 | .998 | .002 |
| 2.73 | .997 | .003 | 2.85 | .998 | .002 | 2.97 | .999 | .001 |
| 2.74 | .997 | .003 | 2.86 | .998 | .002 | 2.98 | .999 | .001 |
| 2.75 | .997 | .003 | 2.87 | .998 | .002 | 2.99 | .999 | .001 |

## 2 Critical values of the $t$ -distribution

Table 2 provides critical values of the  $t$ -distribution to be used in conjunction with calculation of a  $t$ -value. To use the table, follow the steps below:

- 1 Look for the row with the appropriate number of degrees of freedom ( $df$ ). If the exact number does not appear in the table look for the next smaller value of the degrees of

freedom (e.g. 43 degrees of freedom does not appear in the table, so look up 42 degrees of freedom instead).

- 2 Look across the columns until you find the largest value of  $t$  in that row which is smaller than the value obtained from calculation. The value at the very top of that column is the  $p$ -value that you should report, but ...
- 3 If you are using a one-tailed test then use the  $p$ -value in the row that is labelled 'one tail'. Generally speaking, you should only do a one-tailed test if you have a directional hypothesis and are certain that this is the appropriate test.

*Note:* In the table the columns in **bold** highlight commonly used alpha levels.

For example, if the calculated  $t$  is 2.41, with 57 degrees of freedom, then to find the  $p$ -value for a two-tailed test, go to the row with  $df = 55$  and look along this to find the first value that 2.41 exceeds. In this case the value is 2.396 and this corresponds to a two-tailed  $p$ -value of .02. Full results of this  $t$ -test could then be reported as:  $t(57) = 2.41, p < .02$ .

The relevant lines in the table are reproduced below, with relevant numbers in boxes:

| Probability levels ( <i>p</i> ) |       |       |       |       |       |       |       |       |       |       |       |       |       |       |       |       |
|---------------------------------|-------|-------|-------|-------|-------|-------|-------|-------|-------|-------|-------|-------|-------|-------|-------|-------|
| two tails                       | .5    | .4    | .3    | .2    | .1    | .09   | .08   | .07   | .06   | .05   | .04   | .03   | .02   | .01   | .005  | .001  |
| one tail                        | .25   | .2    | .15   | .1    | .05   | .045  | .04   | .035  | .03   | .025  | .02   | .015  | .01   | .005  | .0025 | .0005 |
| 55                              | 0.679 | 0.848 | 1.046 | 1.297 | 1.673 | 1.726 | 1.784 | 1.848 | 1.920 | 2.004 | 2.104 | 2.228 | 2.396 | 2.668 | 2.925 | 3.476 |

Table 2 Critical values of the  $t$ -distribution

| Probability levels ( $p$ ) |       |       |       |       |       |       |       |       |        |        |        |        |        |        |         |         |
|----------------------------|-------|-------|-------|-------|-------|-------|-------|-------|--------|--------|--------|--------|--------|--------|---------|---------|
| two tails                  | .5    | .4    | .3    | .2    | .1    | .09   | .08   | .07   | .06    | .05    | .04    | .03    | .02    | .01    | .005    | .001    |
| one tail                   | .25   | .2    | .15   | .1    | .05   | .045  | .04   | .035  | .03    | .025   | .02    | .015   | .01    | .005   | .0025   | .0005   |
| $df$ 1                     | 1.000 | 1.376 | 1.963 | 3.078 | 6.314 | 7.026 | 7.916 | 9.058 | 10.579 | 12.706 | 15.895 | 21.205 | 31.821 | 63.657 | 127.321 | 636.619 |
| 2                          | 0.816 | 1.061 | 1.386 | 1.886 | 2.920 | 3.104 | 3.320 | 3.578 | 3.896  | 4.303  | 4.849  | 5.643  | 6.965  | 9.925  | 14.089  | 31.599  |
| 3                          | 0.765 | 0.978 | 1.250 | 1.638 | 2.353 | 2.471 | 2.605 | 2.763 | 2.951  | 3.182  | 3.482  | 3.896  | 4.541  | 5.841  | 7.453   | 12.924  |
| 4                          | 0.741 | 0.941 | 1.190 | 1.533 | 2.132 | 2.226 | 2.333 | 2.456 | 2.601  | 2.776  | 2.999  | 3.298  | 3.747  | 4.604  | 5.598   | 8.610   |
| 5                          | 0.727 | 0.920 | 1.156 | 1.476 | 2.015 | 2.098 | 2.191 | 2.297 | 2.422  | 2.571  | 2.757  | 3.003  | 3.365  | 4.032  | 4.773   | 6.869   |
| 6                          | 0.718 | 0.906 | 1.134 | 1.440 | 1.943 | 2.019 | 2.104 | 2.201 | 2.313  | 2.447  | 2.612  | 2.829  | 3.143  | 3.707  | 4.317   | 5.959   |
| 7                          | 0.711 | 0.896 | 1.119 | 1.415 | 1.895 | 1.966 | 2.046 | 2.133 | 2.241  | 2.365  | 2.517  | 2.715  | 2.998  | 3.499  | 4.029   | 5.408   |
| 8                          | 0.706 | 0.889 | 1.108 | 1.397 | 1.860 | 1.928 | 2.004 | 2.090 | 2.189  | 2.306  | 2.449  | 2.634  | 2.896  | 3.355  | 3.833   | 5.041   |
| 9                          | 0.703 | 0.883 | 1.100 | 1.383 | 1.833 | 1.899 | 1.973 | 2.055 | 2.150  | 2.262  | 2.398  | 2.574  | 2.821  | 3.250  | 3.690   | 4.781   |
| 10                         | 0.700 | 0.879 | 1.093 | 1.372 | 1.812 | 1.877 | 1.948 | 2.028 | 2.120  | 2.228  | 2.359  | 2.527  | 2.764  | 3.169  | 3.581   | 4.587   |
| 11                         | 0.697 | 0.876 | 1.088 | 1.363 | 1.796 | 1.859 | 1.928 | 2.007 | 2.096  | 2.201  | 2.328  | 2.491  | 2.718  | 3.106  | 3.497   | 4.437   |
| 12                         | 0.695 | 0.873 | 1.083 | 1.35  | 1.782 | 1.844 | 1.91  | 1.98  | 2.076  | 2.179  | 2.303  | 2.461  | 2.681  | 3.055  | 3.428   | 4.318   |

Statistical Tables 5

|     |       |       |       |           |              |           |           |           |       |              |       |       |       |              |       |              |
|-----|-------|-------|-------|-----------|--------------|-----------|-----------|-----------|-------|--------------|-------|-------|-------|--------------|-------|--------------|
|     |       |       |       | 6         |              | 4         | 2         | 9         |       |              |       |       |       |              |       |              |
| 13  | 0.694 | 0.870 | 1.079 | 1.35<br>0 | <b>1.771</b> | 1.83<br>2 | 1.89<br>9 | 1.97<br>4 | 2.060 | <b>2.160</b> | 2.282 | 2.436 | 2.650 | <b>3.012</b> | 3.372 | <b>4.221</b> |
| 14  | 0.692 | 0.868 | 1.076 | 1.34<br>5 | <b>1.761</b> | 1.82<br>1 | 1.88<br>7 | 1.96<br>2 | 2.046 | <b>2.145</b> | 2.264 | 2.415 | 2.624 | <b>2.977</b> | 3.326 | <b>4.140</b> |
| 15  | 0.691 | 0.866 | 1.074 | 1.34<br>1 | <b>1.753</b> | 1.81<br>2 | 1.87<br>8 | 1.95<br>1 | 2.034 | <b>2.131</b> | 2.249 | 2.397 | 2.602 | <b>2.947</b> | 3.286 | <b>4.073</b> |
| 16  | 0.690 | 0.865 | 1.071 | 1.33<br>7 | <b>1.746</b> | 1.80<br>5 | 1.86<br>9 | 1.94<br>2 | 2.024 | <b>2.120</b> | 2.235 | 2.382 | 2.583 | <b>2.921</b> | 3.252 | <b>4.015</b> |
| 17  | 0.689 | 0.863 | 1.069 | 1.33<br>3 | <b>1.740</b> | 1.79<br>8 | 1.86<br>2 | 1.93<br>4 | 2.015 | <b>2.110</b> | 2.224 | 2.368 | 2.567 | <b>2.898</b> | 3.222 | <b>3.965</b> |
| 18  | 0.688 | 0.862 | 1.067 | 1.33<br>0 | <b>1.734</b> | 1.79<br>2 | 1.85<br>5 | 1.92<br>6 | 2.007 | <b>2.101</b> | 2.214 | 2.356 | 2.552 | <b>2.878</b> | 3.197 | <b>3.922</b> |
| 19  | 0.688 | 0.861 | 1.066 | 1.32<br>8 | <b>1.729</b> | 1.78<br>6 | 1.85<br>0 | 1.92<br>0 | 2.000 | <b>2.093</b> | 2.205 | 2.346 | 2.539 | <b>2.861</b> | 3.174 | <b>3.883</b> |
| 20  | 0.687 | 0.860 | 1.064 | 1.32<br>5 | <b>1.725</b> | 1.78<br>2 | 1.84<br>4 | 1.91<br>4 | 1.994 | <b>2.086</b> | 2.197 | 2.336 | 2.528 | <b>2.845</b> | 3.153 | <b>3.850</b> |
| 22  | 0.686 | 0.858 | 1.061 | 1.32<br>1 | <b>1.717</b> | 1.77<br>3 | 1.83<br>5 | 1.90<br>5 | 1.983 | <b>2.074</b> | 2.183 | 2.320 | 2.508 | <b>2.819</b> | 3.119 | <b>3.792</b> |
| 24  | 0.685 | 0.857 | 1.059 | 1.31<br>8 | <b>1.711</b> | 1.76<br>7 | 1.82<br>8 | 1.89<br>6 | 1.974 | <b>2.064</b> | 2.172 | 2.307 | 2.492 | <b>2.797</b> | 3.091 | <b>3.745</b> |
| 26  | 0.684 | 0.856 | 1.058 | 1.31<br>5 | <b>1.706</b> | 1.76<br>1 | 1.82<br>2 | 1.89<br>0 | 1.967 | <b>2.056</b> | 2.162 | 2.296 | 2.479 | <b>2.779</b> | 3.067 | <b>3.707</b> |
| 28  | 0.683 | 0.855 | 1.056 | 1.31<br>3 | <b>1.701</b> | 1.75<br>6 | 1.81<br>7 | 1.88<br>4 | 1.960 | <b>2.048</b> | 2.154 | 2.286 | 2.467 | <b>2.763</b> | 3.047 | <b>3.674</b> |
| 30  | 0.683 | 0.854 | 1.055 | 1.31<br>0 | <b>1.697</b> | 1.75<br>2 | 1.81<br>2 | 1.87<br>9 | 1.955 | <b>2.042</b> | 2.147 | 2.278 | 2.457 | <b>2.750</b> | 3.030 | <b>3.646</b> |
| 32  | 0.682 | 0.853 | 1.054 | 1.30<br>9 | <b>1.694</b> | 1.74<br>8 | 1.80<br>8 | 1.87<br>5 | 1.950 | <b>2.037</b> | 2.141 | 2.271 | 2.449 | <b>2.738</b> | 3.015 | <b>3.622</b> |
| 34  | 0.682 | 0.852 | 1.052 | 1.30<br>7 | <b>1.691</b> | 1.74<br>5 | 1.80<br>5 | 1.87<br>1 | 1.946 | <b>2.032</b> | 2.136 | 2.265 | 2.441 | <b>2.728</b> | 3.002 | <b>3.601</b> |
| 36  | 0.681 | 0.852 | 1.052 | 1.30<br>6 | <b>1.688</b> | 1.74<br>2 | 1.80<br>2 | 1.86<br>7 | 1.942 | <b>2.028</b> | 2.131 | 2.260 | 2.434 | <b>2.719</b> | 2.990 | <b>3.582</b> |
| 38  | 0.681 | 0.851 | 1.051 | 1.30<br>4 | <b>1.686</b> | 1.74<br>0 | 1.79<br>9 | 1.86<br>4 | 1.939 | <b>2.024</b> | 2.127 | 2.255 | 2.429 | <b>2.712</b> | 2.980 | <b>3.566</b> |
| 40  | 0.681 | 0.851 | 1.050 | 1.30<br>3 | <b>1.684</b> | 1.73<br>7 | 1.79<br>6 | 1.86<br>2 | 1.936 | <b>2.021</b> | 2.123 | 2.250 | 2.423 | <b>2.704</b> | 2.971 | <b>3.551</b> |
| 45  | 0.680 | 0.850 | 1.049 | 1.30<br>1 | <b>1.679</b> | 1.73<br>3 | 1.79<br>1 | 1.85<br>6 | 1.929 | <b>2.014</b> | 2.115 | 2.241 | 2.412 | <b>2.690</b> | 2.952 | <b>3.520</b> |
| 50  | 0.679 | 0.849 | 1.047 | 1.29<br>9 | <b>1.676</b> | 1.72<br>9 | 1.78<br>7 | 1.85<br>2 | 1.924 | <b>2.009</b> | 2.109 | 2.234 | 2.403 | <b>2.678</b> | 2.937 | <b>3.496</b> |
| 55  | 0.679 | 0.848 | 1.046 | 1.29<br>7 | <b>1.673</b> | 1.72<br>6 | 1.78<br>4 | 1.84<br>8 | 1.920 | <b>2.004</b> | 2.104 | 2.228 | 2.396 | <b>2.668</b> | 2.925 | <b>3.476</b> |
| 60  | 0.679 | 0.848 | 1.045 | 1.29<br>6 | <b>1.671</b> | 1.72<br>3 | 1.78<br>1 | 1.84<br>5 | 1.917 | <b>2.000</b> | 2.099 | 2.223 | 2.390 | <b>2.660</b> | 2.915 | <b>3.460</b> |
| 65  | 0.678 | 0.847 | 1.045 | 1.29<br>5 | <b>1.669</b> | 1.72<br>1 | 1.77<br>8 | 1.84<br>2 | 1.914 | <b>1.997</b> | 2.096 | 2.219 | 2.385 | <b>2.654</b> | 2.906 | <b>3.447</b> |
| 70  | 0.678 | 0.847 | 1.044 | 1.29<br>4 | <b>1.667</b> | 1.71<br>9 | 1.77<br>6 | 1.84<br>0 | 1.912 | <b>1.994</b> | 2.093 | 2.215 | 2.381 | <b>2.648</b> | 2.899 | <b>3.435</b> |
| 75  | 0.678 | 0.846 | 1.044 | 1.29<br>3 | <b>1.665</b> | 1.71<br>8 | 1.77<br>5 | 1.83<br>8 | 1.910 | <b>1.992</b> | 2.090 | 2.212 | 2.377 | <b>2.643</b> | 2.892 | <b>3.425</b> |
| 80  | 0.678 | 0.846 | 1.043 | 1.29<br>2 | <b>1.664</b> | 1.71<br>6 | 1.77<br>3 | 1.83<br>6 | 1.908 | <b>1.990</b> | 2.088 | 2.209 | 2.374 | <b>2.639</b> | 2.887 | <b>3.416</b> |
| 85  | 0.677 | 0.846 | 1.043 | 1.29<br>2 | <b>1.663</b> | 1.71<br>5 | 1.77<br>2 | 1.83<br>5 | 1.906 | <b>1.988</b> | 2.086 | 2.207 | 2.371 | <b>2.635</b> | 2.882 | <b>3.409</b> |
| 90  | 0.677 | 0.846 | 1.042 | 1.29<br>1 | <b>1.662</b> | 1.71<br>4 | 1.77<br>1 | 1.83<br>4 | 1.905 | <b>1.987</b> | 2.084 | 2.205 | 2.368 | <b>2.632</b> | 2.878 | <b>3.402</b> |
| 95  | 0.677 | 0.845 | 1.042 | 1.29<br>1 | <b>1.661</b> | 1.71<br>3 | 1.77<br>0 | 1.83<br>3 | 1.904 | <b>1.985</b> | 2.082 | 2.203 | 2.366 | <b>2.629</b> | 2.874 | <b>3.396</b> |
| 100 | 0.677 | 0.845 | 1.042 | 1.29<br>0 | <b>1.660</b> | 1.71<br>2 | 1.76<br>9 | 1.83<br>2 | 1.902 | <b>1.984</b> | 2.081 | 2.201 | 2.364 | <b>2.626</b> | 2.871 | <b>3.390</b> |
| 105 | 0.677 | 0.845 | 1.042 | 1.29<br>0 | <b>1.659</b> | 1.71<br>1 | 1.76<br>8 | 1.83<br>1 | 1.901 | <b>1.983</b> | 2.080 | 2.200 | 2.362 | <b>2.623</b> | 2.868 | <b>3.386</b> |
| 110 | 0.677 | 0.845 | 1.041 | 1.28      | <b>1.659</b> | 1.71      | 1.76      | 1.83      | 1.900 | <b>1.982</b> | 2.078 | 2.199 | 2.361 | <b>2.621</b> | 2.865 | <b>3.381</b> |

*Statistical Tables 6*

|            |       |       |       |           |              |           |           |           |       |              |       |       |       |              |       |              |
|------------|-------|-------|-------|-----------|--------------|-----------|-----------|-----------|-------|--------------|-------|-------|-------|--------------|-------|--------------|
|            |       |       |       | 9         |              | 0         | 7         | 0         |       |              |       |       |       |              |       |              |
| <b>115</b> | 0.677 | 0.845 | 1.041 | 1.28<br>9 | <b>1.658</b> | 1.71<br>0 | 1.76<br>6 | 1.82<br>9 | 1.900 | <b>1.981</b> | 2.077 | 2.197 | 2.359 | <b>2.619</b> | 2.862 | <b>3.377</b> |
| <b>120</b> | 0.677 | 0.845 | 1.041 | 1.28<br>9 | <b>1.658</b> | 1.70<br>9 | 1.76<br>6 | 1.82<br>8 | 1.899 | <b>1.980</b> | 2.076 | 2.196 | 2.358 | <b>2.617</b> | 2.860 | <b>3.373</b> |
| $\infty$   | 0.674 | 0.842 | 1.036 | 1.28<br>2 | <b>1.645</b> | 1.69<br>5 | 1.75<br>1 | 1.81<br>2 | 1.881 | <b>1.960</b> | 2.054 | 2.170 | 2.326 | <b>2.576</b> | 2.807 | <b>3.291</b> |

### 3 Critical values of Pearson's $r$

Table 3 provides critical values of Pearson's  $r$  to be used in conjunction with calculation of a correlation coefficient. To use the table, follow the steps below:

- 1 Look for the row with the appropriate number of degrees of freedom ( $df$ ). If the exact number does not appear in the table look for the next smaller value of the degrees of freedom (e.g. 33 degrees of freedom does not appear in the table, so look up 30 degrees of freedom instead).
- 2 Look across the columns until you find the largest value of  $r$  in that row which is smaller than the absolute (unsigned) value obtained from calculation. The value at the top of that column is the  $p$ -value that you should report.

For example, if the calculated  $r$  is  $-.27$ , with 84 degrees of freedom, then to find the  $p$ -value, go to the row with  $df = 80$  and look along this to find the first value that  $.27$  exceeds. In this case the value is  $.257$  and this corresponds to a two-tailed  $p$ -value of  $.02$  (and a one-tailed  $p$ -value of  $.01$ ). In this case full results of the correlation could then be reported like this:  $r(84) = -.27, p < .02$ .

The relevant lines in the table are reproduced below, with relevant numbers in boxes:

| $df$ | Probability levels for two-tailed test ( $p$ ) |      |      |      |
|------|------------------------------------------------|------|------|------|
|      | .10                                            | .05  | .02  | .01  |
| 80   | .183                                           | .217 | .257 | .283 |

Table 3 Critical values of Pearson's  $r$

| $df$ | Probability levels for two-tailed test ( $p$ ) |      |       |       |
|------|------------------------------------------------|------|-------|-------|
|      | .10                                            | .05  | .02   | .01   |
| 1    | .988                                           | .997 | .9995 | .9999 |
| 2    | .900                                           | .950 | .980  | .990  |
| 3    | .805                                           | .878 | .934  | .959  |
| 4    | .729                                           | .811 | .882  | .917  |
| 5    | .669                                           | .754 | .833  | .875  |
| 6    | .621                                           | .707 | .789  | .834  |
| 7    | .582                                           | .666 | .750  | .798  |
| 8    | .549                                           | .632 | .715  | .765  |
| 9    | .521                                           | .602 | .685  | .735  |
| 10   | .497                                           | .576 | .658  | .708  |
| 11   | .476                                           | .553 | .634  | .684  |
| 12   | .458                                           | .532 | .612  | .661  |
| 13   | .441                                           | .514 | .592  | .641  |
| 14   | .426                                           | .497 | .574  | .623  |
| 15   | .412                                           | .482 | .558  | .606  |
| 16   | .400                                           | .468 | .543  | .590  |
| 17   | .389                                           | .456 | .529  | .575  |
| 18   | .378                                           | .444 | .516  | .561  |

|      |      |      |      |      |
|------|------|------|------|------|
| 19   | .369 | .433 | .503 | .549 |
| 20   | .360 | .423 | .492 | .537 |
| 21   | .352 | .413 | .482 | .526 |
| 22   | .344 | .404 | .472 | .515 |
| 23   | .337 | .396 | .462 | .505 |
| 24   | .330 | .388 | .453 | .496 |
| 25   | .323 | .381 | .445 | .487 |
| 26   | .317 | .374 | .437 | .479 |
| 27   | .311 | .367 | .430 | .471 |
| 28   | .306 | .361 | .423 | .463 |
| 29   | .301 | .355 | .416 | .456 |
| 30   | .296 | .349 | .409 | .449 |
| 35   | .275 | .325 | .381 | .418 |
| 40   | .257 | .304 | .358 | .393 |
| 45   | .243 | .288 | .338 | .372 |
| 50   | .231 | .273 | .322 | .354 |
| 60   | .211 | .250 | .295 | .325 |
| 70   | .195 | .232 | .274 | .302 |
| 80   | .183 | .217 | .257 | .283 |
| 90   | .173 | .205 | .242 | .267 |
| 100  | .164 | .195 | .230 | .254 |
| 200  | .116 | .138 | .164 | .181 |
| 500  | .073 | .088 | .104 | .115 |
| 1000 | .052 | .062 | .073 | .081 |



## 4 Critical values of the $F$ -distribution

Table 4 provides critical values of the  $F$ -distribution to be used in conjunction with calculation of a  $F$ -value. To use the table, follow the steps below:

- 1 Look for the row with the appropriate number of degrees of freedom for the denominator and then the column with the appropriate number of degrees of freedom for the numerator. If the exact number does not appear in the column or row, look for the column or row with the next smallest value of the degrees of freedom (e.g. there is no row for 62 degrees of freedom, so instead look at the row for 60 degrees of freedom).
- 2 For each pair of degrees of freedom three  $F$ -values are listed. These correspond to three commonly used alpha levels ( $\alpha = .05, .01$  and  $.5$ ). Find the largest of these three values which is smaller than the  $F$ -value obtained from calculation. The value in the second column at the left of the table corresponding to the critical value found is the  $p$ -value that you should report.

For example, if the calculated  $F$  is 5.32, with (2, 62) degrees of freedom, then to find the  $F$ -value, go to the column with  $df = 2$  and the row with  $df = 60$ . Look down the three listed values to find the largest value that 5.32 exceeds. In this case the value is 4.98 and this corresponds to an  $F$ -value of .01. Full results of this  $F$ -test could then be reported as:  $F(2, 62) = 5.32, p < .01$ .

The relevant lines in the table are reproduced below, with relevant numbers in boxes:

| Denominator<br>degrees of<br>freedom | Numerator degrees of freedom |      |      |      |
|--------------------------------------|------------------------------|------|------|------|
|                                      | $\alpha$                     | 1    | 2    | 3    |
| 60                                   | 0.05                         | 4.00 | 3.15 | 2.76 |
|                                      | 0.01                         | 7.08 | 4.98 | 4.13 |
|                                      | 0.005                        | 8.49 | 5.79 | 4.73 |
| 65                                   | 0.05                         | 3.99 | 3.14 | 2.75 |
|                                      | 0.01                         | 7.04 | 4.95 | 4.10 |
|                                      | 0.005                        | 8.44 | 5.75 | 4.69 |

Table 4 Critical values of the  $F$ -distribution (Smithson 2000, pp. 426–429)

|    |       | Numerator degrees of freedom |            |            |            |            |            |            |            |            |            |            |            |            |            |            |            |            |            |            |            |            |            |            | Denominator degrees of freedom |
|----|-------|------------------------------|------------|------------|------------|------------|------------|------------|------------|------------|------------|------------|------------|------------|------------|------------|------------|------------|------------|------------|------------|------------|------------|------------|--------------------------------|
|    |       | $\alpha$                     | 1          | 2          | 3          | 4          | 5          | 6          | 7          | 8          | 9          | 10         | 11         | 12         | 13         | 14         | 15         | 20         | 25         | 30         | 40         | 50         | 60         | 80         |                                |
| 1  | 0.05  | 161.4<br>5                   | 199.5<br>0 | 215.7<br>1 | 224.5<br>8 | 230.1<br>6 | 233.9<br>9 | 236.7<br>7 | 238.8<br>8 | 240.5<br>4 | 241.8<br>8 | 242.9<br>8 | 243.9<br>0 | 244.6<br>9 | 245.3<br>6 | 245.9<br>5 | 248.0      | 249.2      | 250.1      | 251.1<br>4 | 251.7<br>7 | 252.2<br>0 | 252.7<br>2 | 253.0<br>4 |                                |
|    | 0.01  | 4052                         | 4999       | 5404       | 5624       | 5764       | 5859       | 5928       | 5981       | 6022       | 6056       | 6083       | 6107       | 6126       | 6143       | 6157       | 6209       | 6240       | 6260       | 6286       | 6302       | 6313       | 6326       | 6334       |                                |
|    | 0.005 | 1621<br>2                    | 1999<br>7  | 2161<br>4  | 2250<br>1  | 2305<br>6  | 2344<br>0  | 23715<br>4 | 2392<br>4  | 2409<br>1  | 2422<br>2  | 2433<br>4  | 2442<br>7  | 2450<br>5  | 2457<br>2  | 2463<br>2  | 2483<br>7  | 2495<br>9  | 2504<br>1  | 2514<br>6  | 2521<br>3  | 2525<br>4  | 2530<br>6  | 2533<br>9  |                                |
| 2  | 0.05  | 18.51                        | 19.00      | 19.16      | 19.25      | 19.30      | 19.33      | 19.35      | 19.37      | 19.38      | 19.40      | 19.40      | 19.41      | 19.42      | 19.42      | 19.43      | 19.45      | 19.46      | 19.46      | 19.47      | 19.48      | 19.48      | 19.48      | 19.49      |                                |
|    | 0.01  | 98.50                        | 99.00      | 99.16      | 99.25      | 99.30      | 99.33      | 99.36      | 99.38      | 99.39      | 99.40      | 99.41      | 99.42      | 99.42      | 99.43      | 99.43      | 99.45      | 99.46      | 99.47      | 99.48      | 99.48      | 99.48      | 99.48      | 99.49      |                                |
|    | 0.005 | 198.5<br>0                   | 199.0<br>1 | 199.1<br>6 | 199.2<br>4 | 199.3<br>0 | 199.3<br>3 | 199.3<br>6 | 199.3<br>8 | 199.3<br>9 | 199.3<br>9 | 199.4<br>2 | 199.4<br>2 | 199.4<br>2 | 199.4<br>3 | 199.4<br>3 | 199.4<br>5 | 199.4<br>5 | 199.4<br>8 | 199.4<br>8 | 199.4<br>8 | 199.4<br>8 | 199.4<br>8 | 199.4<br>8 |                                |
| 3  | 0.05  | 10.13                        | 9.55       | 9.28       | 9.12       | 9.01       | 8.94       | 8.89       | 8.85       | 8.81       | 8.79       | 8.76       | 8.74       | 8.73       | 8.71       | 8.70       | 8.66       | 8.63       | 8.62       | 8.59       | 8.58       | 8.57       | 8.56       | 8.55       |                                |
|    | 0.01  | 34.12                        | 30.82      | 29.46      | 28.71      | 28.24      | 27.91      | 27.67      | 27.49      | 27.34      | 27.23      | 27.13      | 27.05      | 26.98      | 26.92      | 26.87      | 26.69      | 26.58      | 26.50      | 26.41      | 26.35      | 26.32      | 26.27      | 26.24      |                                |
|    | 0.005 | 55.55                        | 49.80      | 47.47      | 46.20      | 45.39      | 44.84      | 44.43      | 44.13      | 43.88      | 43.68      | 43.52      | 43.39      | 43.27      | 43.17      | 43.08      | 42.78      | 42.59      | 42.47      | 42.31      | 42.21      | 42.15      | 42.07      | 42.02      |                                |
| 4  | 0.05  | 7.71                         | 6.94       | 6.59       | 6.39       | 6.26       | 6.16       | 6.09       | 6.04       | 6.00       | 5.96       | 5.94       | 5.91       | 5.89       | 5.87       | 5.86       | 5.80       | 5.77       | 5.75       | 5.72       | 5.70       | 5.69       | 5.67       | 5.66       |                                |
|    | 0.01  | 21.20                        | 18.00      | 16.69      | 15.98      | 15.52      | 15.21      | 14.98      | 14.80      | 14.66      | 14.55      | 14.45      | 14.37      | 14.31      | 14.25      | 14.20      | 14.02      | 13.91      | 13.84      | 13.75      | 13.69      | 13.65      | 13.61      | 13.58      |                                |
|    | 0.005 | 31.33                        | 26.28      | 24.26      | 23.15      | 22.46      | 21.98      | 21.62      | 21.35      | 21.14      | 20.97      | 20.82      | 20.70      | 20.60      | 20.51      | 20.44      | 20.17      | 20.00      | 19.89      | 19.75      | 19.67      | 19.61      | 19.54      | 19.50      |                                |
| 5  | 0.05  | 6.61                         | 5.79       | 5.41       | 5.19       | 5.05       | 4.95       | 4.88       | 4.82       | 4.77       | 4.74       | 4.70       | 4.68       | 4.66       | 4.64       | 4.62       | 4.56       | 4.52       | 4.50       | 4.46       | 4.44       | 4.43       | 4.41       | 4.41       |                                |
|    | 0.01  | 16.26                        | 13.27      | 12.06      | 11.39      | 10.97      | 10.67      | 10.46      | 10.29      | 10.16      | 10.05      | 9.96       | 9.89       | 9.82       | 9.77       | 9.72       | 9.55       | 9.45       | 9.38       | 9.29       | 9.24       | 9.20       | 9.16       | 9.13       |                                |
|    | 0.005 | 22.78                        | 18.31      | 16.53      | 15.56      | 14.94      | 14.51      | 14.20      | 13.96      | 13.77      | 13.62      | 13.49      | 13.33<br>8 | 13.29      | 13.21      | 13.15      | 12.90      | 12.76      | 12.66      | 12.53      | 12.45      | 12.40      | 12.34      | 12.30      |                                |
| 6  | 0.05  | 5.99                         | 5.14       | 4.76       | 4.53       | 4.39       | 4.28       | 4.21       | 4.15       | 4.10       | 4.06       | 4.03       | 4.00       | 3.98       | 3.96       | 3.94       | 3.87       | 3.83       | 3.81       | 3.77       | 3.75       | 3.74       | 3.72       | 3.71       |                                |
|    | 0.01  | 13.75                        | 10.92      | 9.78       | 9.15       | 8.75       | 8.47       | 8.26       | 8.10       | 7.98       | 7.87       | 7.79       | 7.72       | 7.66       | 7.60       | 7.56       | 7.40       | 7.30       | 7.23       | 7.14       | 7.09       | 7.06       | 7.01       | 6.99       |                                |
|    | 0.005 | 18.63                        | 14.54      | 12.92      | 12.03      | 11.46      | 11.07      | 10.79      | 10.57      | 10.39      | 10.25      | 10.13      | 10.03      | 9.95       | 9.88       | 9.81       | 9.59       | 9.45       | 9.36       | 9.24       | 9.17       | 9.12       | 9.06       | 9.03       |                                |
| 7  | 0.05  | 5.59                         | 4.74       | 4.35       | 4.12       | 3.97       | 3.87       | 3.79       | 3.73       | 3.68       | 3.64       | 3.60       | 3.57       | 3.55       | 3.53       | 3.51       | 3.44       | 3.40       | 3.38       | 3.34       | 3.32       | 3.30       | 3.29       | 3.27       |                                |
|    | 0.01  | 12.25                        | 9.55       | 8.45       | 7.85       | 7.46       | 7.19       | 6.99       | 6.84       | 6.72       | 6.62       | 6.54       | 6.47       | 6.41       | 6.36       | 6.31       | 6.16       | 6.06       | 5.99       | 5.91       | 5.86       | 5.82       | 5.78       | 5.75       |                                |
|    | 0.005 | 16.24                        | 12.40      | 10.88      | 10.05      | 9.52       | 9.16       | 8.89       | 8.68       | 8.51       | 8.38       | 8.27       | 8.18       | 8.10       | 8.03       | 7.97       | 7.75       | 7.62       | 7.53       | 7.42       | 7.35       | 7.31       | 7.25       | 7.22       |                                |
| 8  | 0.05  | 5.32                         | 4.46       | 4.07       | 3.84       | 3.69       | 3.58       | 3.50       | 3.44       | 3.39       | 3.35       | 3.31       | 3.28       | 3.26       | 3.24       | 3.22       | 3.15       | 3.11       | 3.08       | 3.04       | 3.02       | 3.01       | 2.99       | 2.97       |                                |
|    | 0.01  | 11.26                        | 8.65       | 7.59       | 7.01       | 6.63       | 6.37       | 6.18       | 6.03       | 5.91       | 5.81       | 5.73       | 5.67       | 5.61       | 5.56       | 5.52       | 5.36       | 5.26       | 5.20       | 5.12       | 5.07       | 5.03       | 4.99       | 4.96       |                                |
|    | 0.005 | 14.69                        | 11.04      | 9.60       | 8.81       | 8.30       | 7.95       | 7.69       | 7.50       | 7.34       | 7.21       | 7.10       | 7.01       | 6.94       | 6.87       | 6.81       | 6.61       | 6.48       | 6.40       | 6.29       | 6.22       | 6.18       | 6.12       | 6.09       |                                |
| 9  | 0.05  | 5.12                         | 4.26       | 3.86       | 3.63       | 3.48       | 3.37       | 3.29       | 3.23       | 3.18       | 3.14       | 3.10       | 3.07       | 3.05       | 3.03       | 3.01       | 2.94       | 2.89       | 2.86       | 2.83       | 2.80       | 2.79       | 2.77       | 2.76       |                                |
|    | 0.01  | 10.56                        | 8.02       | 6.99       | 6.42       | 6.06       | 5.80       | 5.61       | 5.47       | 5.35       | 5.26       | 5.18       | 5.11       | 5.05       | 5.01       | 4.96       | 4.81       | 4.71       | 4.65       | 4.57       | 4.52       | 4.48       | 4.44       | 4.41       |                                |
|    | 0.005 | 13.61                        | 10.11      | 8.72       | 7.96       | 7.47       | 7.13       | 6.88       | 6.69       | 6.54       | 6.42       | 6.31       | 6.23       | 6.15       | 6.09       | 6.03       | 5.83       | 5.71       | 5.62       | 5.52       | 5.45       | 5.41       | 5.36       | 5.32       |                                |
| 10 | 0.05  | 4.96                         | 4.10       | 3.71       | 3.48       | 3.33       | 3.22       | 3.14       | 3.07       | 3.02       | 2.98       | 2.94       | 2.91       | 2.89       | 2.86       | 2.85       | 2.77       | 2.73       | 2.70       | 2.66       | 2.64       | 2.62       | 2.60       | 2.59       |                                |

|    |       |       |      |      |      |      |      |      |      |      |      |      |      |      |      |      |      |      |      |      |      |      |      |      |
|----|-------|-------|------|------|------|------|------|------|------|------|------|------|------|------|------|------|------|------|------|------|------|------|------|------|
|    | 0.01  | 10.04 | 7.56 | 6.55 | 5.99 | 5.64 | 5.39 | 5.20 | 5.06 | 4.94 | 4.85 | 4.77 | 4.71 | 4.65 | 4.60 | 4.56 | 4.41 | 4.31 | 4.25 | 4.17 | 4.12 | 4.08 | 4.04 | 4.01 |
|    | 0.005 | 12.83 | 9.43 | 8.08 | 7.34 | 6.87 | 6.54 | 6.30 | 6.12 | 5.97 | 5.85 | 5.75 | 5.66 | 5.59 | 5.53 | 5.47 | 5.27 | 5.15 | 5.07 | 4.97 | 4.90 | 4.86 | 4.80 | 4.77 |
| 11 | 0.05  | 4.84  | 3.98 | 3.59 | 3.36 | 3.20 | 3.09 | 3.01 | 2.95 | 2.90 | 2.85 | 2.82 | 2.79 | 2.76 | 2.74 | 2.72 | 2.65 | 2.60 | 2.57 | 2.53 | 2.51 | 2.49 | 2.47 | 2.46 |
|    | 0.01  | 9.65  | 7.21 | 6.22 | 5.67 | 5.32 | 5.07 | 4.89 | 4.74 | 4.63 | 4.54 | 4.46 | 4.40 | 4.34 | 4.29 | 4.25 | 4.10 | 4.01 | 3.94 | 3.86 | 3.81 | 3.78 | 3.73 | 3.71 |
|    | 0.005 | 12.23 | 8.91 | 7.60 | 6.88 | 6.42 | 6.10 | 5.86 | 5.68 | 5.54 | 5.42 | 5.32 | 5.24 | 5.16 | 5.10 | 5.05 | 4.86 | 4.74 | 4.65 | 4.55 | 4.49 | 4.45 | 4.39 | 4.36 |
| 12 | 0.05  | 4.75  | 3.89 | 3.49 | 3.26 | 3.11 | 3.00 | 2.91 | 2.85 | 2.80 | 2.75 | 2.72 | 2.69 | 2.66 | 2.64 | 2.62 | 2.54 | 2.50 | 2.47 | 2.43 | 2.40 | 2.38 | 2.36 | 2.35 |
|    | 0.01  | 9.33  | 6.93 | 5.95 | 5.41 | 5.06 | 4.82 | 4.64 | 4.50 | 4.39 | 4.30 | 4.22 | 4.16 | 4.10 | 4.05 | 4.01 | 3.86 | 3.76 | 3.70 | 3.62 | 3.57 | 3.54 | 3.49 | 3.47 |
|    | 0.005 | 11.75 | 8.51 | 7.23 | 6.52 | 6.07 | 5.76 | 5.52 | 5.35 | 5.20 | 5.09 | 4.99 | 4.91 | 4.84 | 4.77 | 4.72 | 4.53 | 4.41 | 4.33 | 4.23 | 4.17 | 4.12 | 4.07 | 4.04 |
| 13 | 0.05  | 4.67  | 3.81 | 3.41 | 3.18 | 3.03 | 2.92 | 2.83 | 2.77 | 2.71 | 2.67 | 2.63 | 2.60 | 2.58 | 2.55 | 2.53 | 2.46 | 2.41 | 2.38 | 2.34 | 2.31 | 2.30 | 2.27 | 2.26 |
|    | 0.01  | 9.07  | 6.70 | 5.74 | 5.21 | 4.86 | 4.62 | 4.44 | 4.30 | 4.19 | 4.10 | 4.02 | 3.96 | 3.91 | 3.86 | 3.82 | 3.66 | 3.57 | 3.51 | 3.43 | 3.38 | 3.34 | 3.30 | 3.27 |
|    | 0.005 | 11.37 | 8.19 | 6.93 | 6.23 | 5.79 | 5.48 | 5.25 | 5.08 | 4.94 | 4.82 | 4.72 | 4.64 | 4.57 | 4.51 | 4.46 | 4.27 | 4.15 | 4.07 | 3.97 | 3.91 | 3.87 | 3.81 | 3.78 |
| 14 | 0.05  | 4.60  | 3.74 | 3.34 | 3.11 | 2.96 | 2.85 | 2.76 | 2.70 | 2.65 | 2.60 | 2.57 | 2.53 | 2.51 | 2.48 | 2.46 | 2.39 | 2.34 | 2.31 | 2.27 | 2.24 | 2.22 | 2.20 | 2.19 |
|    | 0.01  | 8.86  | 6.51 | 5.56 | 5.04 | 4.69 | 4.46 | 4.28 | 4.14 | 4.03 | 3.94 | 3.86 | 3.80 | 3.75 | 3.70 | 3.66 | 3.51 | 3.41 | 3.35 | 3.27 | 3.22 | 3.18 | 3.14 | 3.11 |
|    | 0.005 | 11.06 | 7.92 | 6.68 | 6.00 | 5.56 | 5.26 | 5.03 | 4.86 | 4.72 | 4.60 | 4.51 | 3.43 | 4.36 | 4.30 | 4.25 | 4.06 | 3.94 | 3.86 | 3.76 | 3.70 | 3.66 | 3.60 | 3.57 |
| 15 | 0.05  | 4.54  | 3.68 | 3.29 | 3.06 | 2.9  | 2.79 | 2.71 | 2.64 | 2.59 | 2.54 | 2.51 | 2.48 | 2.45 | 2.42 | 2.40 | 2.33 | 2.28 | 2.25 | 2.20 | 2.18 | 2.16 | 2.14 | 2.12 |
|    | 0.01  | 8.68  | 6.36 | 5.42 | 4.89 | 4.56 | 4.32 | 4.14 | 4.00 | 3.89 | 3.80 | 3.73 | 3.67 | 3.61 | 3.56 | 3.52 | 3.37 | 3.28 | 3.21 | 3.13 | 3.08 | 3.05 | 3.00 | 2.98 |
|    | 0.005 | 10.80 | 7.70 | 6.48 | 5.80 | 5.37 | 5.07 | 4.85 | 4.67 | 4.54 | 4.42 | 4.33 | 4.25 | 4.18 | 4.12 | 4.07 | 3.88 | 3.77 | 3.69 | 3.59 | 3.52 | 3.48 | 3.43 | 3.39 |
| 16 | 0.05  | 4.49  | 3.63 | 3.24 | 3.01 | 2.85 | 2.74 | 2.66 | 2.59 | 2.54 | 2.49 | 2.46 | 2.42 | 2.40 | 2.37 | 2.35 | 2.28 | 2.23 | 2.19 | 2.15 | 2.12 | 2.11 | 2.08 | 2.07 |
|    | 0.01  | 8.53  | 6.23 | 5.29 | 4.77 | 4.44 | 4.20 | 4.03 | 3.89 | 3.78 | 3.69 | 3.62 | 3.55 | 3.50 | 3.45 | 3.41 | 3.26 | 3.16 | 3.10 | 3.02 | 2.97 | 2.93 | 2.89 | 2.86 |
|    | 0.005 | 10.58 | 7.51 | 6.30 | 5.64 | 5.21 | 4.91 | 4.69 | 4.52 | 4.38 | 4.27 | 4.18 | 4.10 | 4.03 | 3.97 | 3.92 | 3.73 | 3.62 | 3.54 | 3.44 | 3.37 | 3.33 | 3.28 | 3.25 |
| 17 | 0.05  | 4.45  | 3.59 | 3.20 | 2.96 | 2.81 | 2.70 | 2.61 | 2.55 | 2.49 | 2.45 | 2.41 | 2.38 | 2.35 | 2.33 | 2.31 | 2.23 | 2.18 | 2.15 | 2.10 | 2.08 | 2.06 | 2.03 | 2.02 |
|    | 0.01  | 9.40  | 6.11 | 5.19 | 4.67 | 4.34 | 4.10 | 3.93 | 3.79 | 3.68 | 3.59 | 3.52 | 3.46 | 3.40 | 3.35 | 3.31 | 3.16 | 3.07 | 3.00 | 2.92 | 2.87 | 2.83 | 2.79 | 2.76 |
|    | 0.005 | 10.38 | 7.35 | 6.16 | 5.50 | 5.07 | 4.78 | 4.56 | 4.39 | 4.25 | 4.14 | 4.05 | 3.97 | 3.90 | 3.84 | 3.79 | 3.61 | 3.49 | 3.41 | 3.31 | 3.25 | 3.21 | 3.15 | 3.12 |
| 18 | 0.05  | 4.41  | 3.55 | 3.16 | 2.93 | 2.77 | 2.66 | 2.58 | 2.51 | 2.46 | 2.41 | 2.37 | 2.34 | 2.31 | 2.29 | 2.27 | 2.19 | 2.14 | 2.11 | 2.06 | 2.04 | 2.02 | 1.99 | 1.98 |
|    | 0.01  | 8.29  | 6.01 | 5.09 | 4.58 | 4.25 | 4.01 | 3.84 | 3.74 | 3.60 | 3.51 | 3.43 | 3.37 | 3.32 | 3.27 | 3.23 | 3.08 | 2.98 | 2.92 | 2.84 | 2.78 | 2.75 | 2.70 | 2.68 |
|    | 0.005 | 10.22 | 7.21 | 6.03 | 5.37 | 4.96 | 4.66 | 4.44 | 4.28 | 4.14 | 4.03 | 3.94 | 3.86 | 3.79 | 3.73 | 3.68 | 3.50 | 3.38 | 3.30 | 3.20 | 3.14 | 3.10 | 3.04 | 3.01 |
| 19 | 0.05  | 4.38  | 3.52 | 3.13 | 2.90 | 2.74 | 2.63 | 2.54 | 2.48 | 2.42 | 2.38 | 2.34 | 2.31 | 2.28 | 2.26 | 2.23 | 2.16 | 2.11 | 2.07 | 2.03 | 2.00 | 1.98 | 1.96 | 1.94 |
|    | 0.01  | 8.18  | 5.93 | 5.01 | 4.50 | 4.17 | 3.94 | 3.77 | 3.63 | 3.52 | 3.43 | 3.36 | 3.30 | 3.24 | 3.19 | 3.15 | 3.00 | 2.91 | 2.84 | 2.76 | 2.71 | 2.67 | 2.63 | 2.60 |
|    | 0.005 | 10.07 | 7.09 | 5.92 | 4.27 | 4.85 | 4.56 | 4.34 | 4.18 | 4.04 | 3.93 | 3.84 | 3.76 | 3.70 | 3.64 | 3.59 | 3.40 | 3.29 | 3.21 | 3.11 | 3.04 | 3.00 | 2.95 | 2.91 |
| 20 | 0.05  | 4.35  | 3.49 | 3.10 | 2.87 | 2.71 | 2.60 | 2.51 | 2.45 | 2.39 | 2.35 | 2.31 | 2.28 | 2.25 | 2.22 | 2.20 | 2.12 | 2.07 | 2.04 | 1.99 | 1.97 | 1.95 | 1.92 | 1.91 |
|    | 0.01  | 8.10  | 5.85 | 4.94 | 4.43 | 4.10 | 3.87 | 3.70 | 3.56 | 3.46 | 3.37 | 3.29 | 3.23 | 3.18 | 3.13 | 3.09 | 2.94 | 2.84 | 2.78 | 2.69 | 2.64 | 2.61 | 2.56 | 2.54 |
|    | 0.005 | 9.94  | 6.99 | 5.82 | 5.17 | 4.76 | 4.47 | 4.26 | 4.09 | 3.96 | 3.85 | 3.76 | 3.68 | 3.61 | 3.55 | 3.50 | 3.32 | 3.20 | 3.12 | 3.02 | 2.96 | 2.92 | 2.86 | 2.83 |
| 21 | 0.05  | 4.32  | 3.47 | 3.07 | 2.84 | 2.68 | 2.57 | 2.49 | 2.42 | 2.37 | 2.32 | 2.28 | 2.25 | 2.22 | 2.20 | 2.18 | 2.10 | 2.05 | 2.01 | 1.96 | 1.94 | 1.92 | 1.89 | 1.88 |
|    | 0.01  | 8.02  | 5.78 | 4.87 | 4.37 | 4.04 | 3.81 | 3.64 | 3.51 | 3.40 | 3.31 | 3.24 | 3.17 | 3.12 | 3.07 | 3.03 | 2.88 | 2.79 | 2.72 | 2.64 | 2.58 | 2.55 | 2.50 | 2.48 |
|    | 0.005 | 9.83  | 6.89 | 5.73 | 5.09 | 4.68 | 4.39 | 4.18 | 4.01 | 3.88 | 3.77 | 3.68 | 3.60 | 3.54 | 3.48 | 3.43 | 3.24 | 3.13 | 3.05 | 2.95 | 2.88 | 2.84 | 2.79 | 2.75 |
| 22 | 0.05  | 4.30  | 3.44 | 3.05 | 2.82 | 2.66 | 2.55 | 2.46 | 2.40 | 2.34 | 2.30 | 2.26 | 2.23 | 2.20 | 2.17 | 2.15 | 2.07 | 2.02 | 1.98 | 1.94 | 1.91 | 1.89 | 1.86 | 1.85 |
|    | 0.01  | 7.95  | 5.72 | 4.82 | 4.31 | 3.99 | 3.76 | 3.59 | 3.45 | 3.35 | 3.26 | 3.18 | 3.12 | 3.07 | 3.02 | 2.98 | 2.83 | 2.73 | 2.67 | 2.58 | 2.53 | 2.50 | 2.45 | 2.42 |

|    |       |      |      |      |      |      |      |      |      |      |      |      |      |      |      |      |      |      |      |      |      |      |      |      |
|----|-------|------|------|------|------|------|------|------|------|------|------|------|------|------|------|------|------|------|------|------|------|------|------|------|
|    | 0.005 | 9.73 | 6.81 | 5.65 | 5.02 | 4.61 | 4.32 | 4.11 | 3.94 | 3.81 | 3.70 | 3.61 | 3.54 | 3.47 | 3.41 | 3.36 | 3.18 | 3.06 | 2.98 | 2.88 | 2.82 | 2.77 | 2.72 | 2.69 |
| 23 | 0.05  | 4.28 | 3.42 | 3.03 | 2.80 | 2.64 | 2.53 | 2.44 | 2.37 | 2.32 | 2.27 | 2.24 | 2.20 | 2.18 | 2.15 | 2.13 | 2.05 | 2.00 | 1.96 | 1.91 | 1.88 | 1.86 | 1.84 | 1.82 |
|    | 0.01  | 7.98 | 5.66 | 4.76 | 4.26 | 3.94 | 3.71 | 3.54 | 3.41 | 3.30 | 3.21 | 3.14 | 3.07 | 3.02 | 2.97 | 2.93 | 2.78 | 2.69 | 2.62 | 2.54 | 2.48 | 2.45 | 2.40 | 2.37 |
|    | 0.005 | 9.63 | 6.73 | 5.58 | 4.95 | 4.54 | 4.26 | 4.05 | 3.88 | 3.75 | 3.64 | 3.55 | 3.47 | 3.41 | 3.35 | 3.30 | 3.12 | 3.00 | 2.92 | 2.82 | 2.76 | 2.71 | 2.66 | 2.62 |
| 24 | 0.05  | 4.26 | 3.40 | 3.01 | 2.78 | 2.62 | 2.51 | 2.42 | 2.36 | 2.30 | 2.25 | 2.22 | 2.18 | 2.15 | 2.13 | 2.11 | 2.03 | 1.97 | 1.94 | 1.89 | 1.86 | 1.84 | 1.82 | 1.80 |
|    | 0.01  | 7.92 | 5.61 | 4.72 | 4.22 | 3.90 | 3.67 | 3.50 | 3.36 | 3.26 | 3.17 | 3.09 | 3.03 | 2.98 | 2.93 | 2.89 | 2.74 | 2.64 | 2.58 | 2.49 | 2.44 | 2.40 | 2.36 | 2.33 |
|    | 0.005 | 9.55 | 6.66 | 5.52 | 4.89 | 4.49 | 4.20 | 3.99 | 3.83 | 3.69 | 3.59 | 3.50 | 3.42 | 3.35 | 3.30 | 3.25 | 3.06 | 2.95 | 2.87 | 2.77 | 2.70 | 2.66 | 2.60 | 2.57 |
| 25 | 0.05  | 4.24 | 3.39 | 2.99 | 2.76 | 2.60 | 2.49 | 2.40 | 2.34 | 2.28 | 2.24 | 2.20 | 2.16 | 2.14 | 2.11 | 2.09 | 2.01 | 1.96 | 1.92 | 1.87 | 1.84 | 1.82 | 1.80 | 1.78 |
|    | 0.01  | 7.77 | 5.57 | 4.68 | 4.18 | 3.85 | 3.63 | 3.46 | 3.32 | 3.22 | 3.13 | 3.06 | 2.99 | 2.94 | 2.89 | 2.85 | 2.70 | 2.60 | 2.54 | 2.45 | 2.40 | 2.36 | 2.32 | 2.29 |
|    | 0.005 | 9.48 | 6.60 | 5.46 | 4.84 | 4.43 | 4.15 | 3.94 | 3.78 | 3.64 | 3.54 | 3.45 | 3.37 | 3.30 | 3.25 | 3.20 | 3.01 | 2.90 | 2.82 | 2.72 | 2.65 | 2.61 | 2.55 | 2.52 |
| 26 | 0.05  | 4.23 | 3.37 | 2.98 | 2.74 | 2.59 | 2.47 | 2.39 | 2.32 | 2.27 | 2.22 | 2.18 | 2.15 | 2.12 | 2.09 | 2.07 | 1.99 | 1.94 | 1.90 | 1.85 | 1.82 | 1.80 | 1.78 | 1.76 |
|    | 0.01  | 7.72 | 5.53 | 4.64 | 4.14 | 3.82 | 3.59 | 3.42 | 3.29 | 3.18 | 3.09 | 3.02 | 2.96 | 2.90 | 2.86 | 2.81 | 2.66 | 2.57 | 2.50 | 2.42 | 2.36 | 2.33 | 2.28 | 2.25 |
|    | 0.005 | 9.41 | 6.54 | 5.41 | 4.79 | 4.38 | 4.10 | 3.89 | 3.73 | 3.60 | 3.49 | 3.40 | 3.33 | 3.26 | 3.20 | 3.15 | 2.97 | 2.85 | 2.77 | 2.67 | 2.61 | 2.56 | 2.51 | 2.47 |
| 27 | 0.05  | 4.21 | 3.35 | 2.96 | 2.73 | 2.57 | 2.46 | 2.37 | 2.31 | 2.25 | 2.20 | 2.17 | 1.13 | 2.10 | 2.08 | 2.06 | 1.97 | 1.92 | 1.88 | 1.84 | 1.81 | 1.79 | 1.76 | 1.74 |
|    | 0.01  | 7.68 | 5.49 | 4.60 | 4.11 | 3.78 | 3.56 | 3.39 | 3.26 | 3.15 | 3.06 | 2.99 | 2.93 | 2.87 | 2.82 | 2.78 | 2.63 | 2.54 | 2.47 | 2.38 | 2.33 | 2.29 | 2.25 | 2.22 |
|    | 0.005 | 9.34 | 6.49 | 5.36 | 4.74 | 4.34 | 4.06 | 3.85 | 3.69 | 3.56 | 3.45 | 3.36 | 3.28 | 3.22 | 3.16 | 3.11 | 2.93 | 2.81 | 2.73 | 2.63 | 2.57 | 2.52 | 2.47 | 2.43 |
| 28 | 0.05  | 4.20 | 3.34 | 2.95 | 2.71 | 2.56 | 2.45 | 2.36 | 2.29 | 2.24 | 2.19 | 2.15 | 2.12 | 2.09 | 2.06 | 2.04 | 1.96 | 1.91 | 1.87 | 1.82 | 1.79 | 1.77 | 1.74 | 1.73 |
|    | 0.01  | 7.64 | 5.45 | 4.57 | 4.07 | 3.75 | 3.53 | 3.36 | 3.23 | 3.12 | 3.03 | 2.96 | 2.90 | 2.84 | 2.79 | 2.75 | 2.60 | 2.51 | 2.44 | 2.35 | 2.30 | 2.26 | 2.22 | 2.19 |
|    | 0.005 | 9.28 | 6.44 | 5.32 | 4.70 | 4.30 | 4.02 | 3.81 | 3.65 | 3.52 | 3.41 | 3.32 | 3.25 | 3.18 | 3.12 | 3.07 | 2.89 | 2.77 | 2.69 | 2.59 | 2.53 | 2.48 | 2.43 | 2.39 |
| 29 | 0.05  | 4.18 | 3.33 | 2.93 | 2.70 | 2.55 | 2.43 | 2.35 | 2.28 | 2.22 | 2.18 | 2.14 | 2.10 | 2.08 | 2.05 | 2.03 | 1.94 | 1.89 | 1.85 | 1.81 | 1.77 | 1.75 | 1.73 | 1.71 |
|    | 0.01  | 7.60 | 5.42 | 4.54 | 4.04 | 3.73 | 3.50 | 3.33 | 3.20 | 3.09 | 3.00 | 2.93 | 2.87 | 2.81 | 2.77 | 2.73 | 2.57 | 2.48 | 2.41 | 2.33 | 2.27 | 2.23 | 2.19 | 2.16 |
|    | 0.005 | 9.23 | 6.40 | 5.28 | 4.66 | 4.26 | 3.98 | 3.77 | 3.61 | 3.48 | 3.38 | 3.29 | 3.21 | 3.15 | 3.09 | 3.04 | 2.86 | 2.74 | 2.66 | 2.56 | 2.49 | 2.45 | 2.39 | 2.36 |
| 30 | 0.05  | 4.17 | 3.32 | 2.92 | 2.69 | 2.53 | 2.42 | 2.33 | 2.27 | 2.21 | 2.16 | 2.13 | 2.09 | 2.06 | 2.04 | 2.01 | 1.93 | 1.88 | 1.84 | 1.79 | 1.76 | 1.74 | 1.71 | 1.70 |
|    | 0.01  | 7.56 | 5.39 | 4.51 | 4.02 | 3.70 | 3.47 | 3.30 | 3.17 | 3.07 | 2.98 | 2.91 | 2.84 | 2.79 | 2.74 | 2.70 | 2.55 | 2.45 | 2.39 | 2.30 | 2.25 | 2.21 | 2.16 | 2.13 |
|    | 0.005 | 9.18 | 6.35 | 5.24 | 4.62 | 4.23 | 3.95 | 3.74 | 3.58 | 3.45 | 3.34 | 3.25 | 3.18 | 3.11 | 3.06 | 3.01 | 2.82 | 2.71 | 2.63 | 2.52 | 2.46 | 2.42 | 2.36 | 2.32 |
| 32 | 0.05  | 4.15 | 3.29 | 2.90 | 2.67 | 2.51 | 2.40 | 2.31 | 2.24 | 2.19 | 2.14 | 2.10 | 2.07 | 2.04 | 2.01 | 1.99 | .91  | 1.85 | 1.82 | 1.77 | 1.74 | 1.71 | 1.69 | 1.67 |
|    | 0.01  | 7.50 | 5.34 | 4.46 | 3.97 | 3.65 | 3.43 | 3.26 | 3.13 | 3.02 | 2.93 | 2.86 | 2.80 | 2.74 | 2.70 | 2.65 | .50  | 2.41 | 2.34 | 2.25 | 2.20 | 2.16 | 2.11 | 2.08 |
|    | 0.005 | 9.09 | 6.28 | 5.17 | 4.56 | 4.17 | 3.89 | 3.68 | 3.52 | 3.39 | 3.29 | 3.20 | 3.12 | 3.06 | 3.00 | 2.95 | .77  | 2.65 | 2.57 | 2.47 | 2.40 | 2.36 | 2.30 | 2.26 |
| 34 | 0.05  | 4.13 | 3.28 | 2.88 | 2.65 | 2.49 | 2.38 | 2.29 | 2.23 | 2.17 | 2.12 | 2.08 | 2.05 | 2.02 | 1.99 | 1.97 | .89  | 1.83 | 1.80 | 1.75 | 1.71 | 1.69 | 1.66 | 1.65 |
|    | 0.01  | 7.44 | 5.29 | 4.42 | 3.93 | 3.61 | 3.39 | 3.22 | 3.09 | 2.98 | 2.89 | 2.82 | 2.76 | 2.70 | 2.66 | 2.61 | .46  | 2.37 | 2.30 | 2.21 | 2.16 | 2.12 | 2.07 | 2.04 |
|    | 0.005 | 9.01 | 6.22 | 5.11 | 4.50 | 4.11 | 3.84 | 3.63 | 3.47 | 3.34 | 3.24 | 3.15 | 3.07 | 3.01 | 2.95 | 2.90 | .72  | 2.60 | 2.52 | 2.42 | 2.35 | 2.30 | 2.25 | 2.21 |
| 36 | 0.05  | 4.11 | 3.26 | 2.87 | 2.63 | 2.48 | 2.36 | 2.28 | 2.21 | 2.15 | 2.11 | 2.07 | 2.03 | 2.00 | 1.98 | 1.95 | .87  | 1.81 | 1.78 | 1.73 | 1.69 | 1.67 | 1.64 | 1.62 |
|    | 0.01  | 7.40 | 5.25 | 4.38 | 3.89 | 3.57 | 3.35 | 3.18 | 3.05 | 2.95 | 2.86 | 2.79 | 2.72 | 2.67 | 2.62 | 2.58 | .43  | 2.33 | 2.26 | 2.18 | 2.12 | 2.08 | 2.03 | 2.00 |
|    | 0.005 | 8.94 | 6.16 | 5.06 | 4.46 | 4.06 | 3.79 | 3.58 | 3.42 | 3.30 | 3.19 | 3.10 | 3.03 | 2.96 | 2.90 | 2.85 | .67  | 2.56 | 2.48 | 2.37 | 2.30 | 2.26 | 2.20 | 2.17 |
| 38 | 0.05  | 4.10 | 3.24 | 2.85 | 2.62 | 2.46 | 2.35 | 2.26 | 2.19 | 2.14 | 2.09 | 2.05 | 2.02 | 1.99 | 1.96 | 1.94 | .85  | 1.80 | 1.76 | 1.71 | 1.68 | 1.65 | 1.62 | 1.61 |
|    | 0.01  | 7.35 | 5.21 | 4.34 | 3.86 | 3.54 | 3.32 | 3.15 | 3.02 | 2.92 | 2.83 | 2.75 | 2.69 | 2.64 | 2.59 | 2.55 | .40  | 2.30 | 2.23 | 2.14 | 2.09 | 2.05 | 2.00 | 1.97 |
|    | 0.005 | 8.88 | 6.11 | 5.02 | 4.41 | 4.02 | 3.75 | 3.54 | 3.39 | 3.26 | 3.15 | 3.06 | 2.99 | 2.92 | 2.87 | 2.82 | .63  | 2.52 | 2.44 | 2.33 | 2.27 | 2.22 | 2.16 | 2.12 |

|     |       |      |      |      |      |      |      |      |      |      |      |      |      |      |      |      |      |      |      |      |      |      |      |      |
|-----|-------|------|------|------|------|------|------|------|------|------|------|------|------|------|------|------|------|------|------|------|------|------|------|------|
| 40  | 0.05  | 4.08 | 3.23 | 2.84 | 2.61 | 2.45 | 2.34 | 2.25 | 2.18 | 2.12 | 2.08 | 2.04 | 2.00 | 1.97 | 1.95 | 1.92 | .84  | 1.78 | 1.74 | 1.69 | 1.66 | 1.64 | 1.61 | 1.59 |
|     | 0.01  | 7.31 | 5.18 | 4.31 | 3.83 | 3.51 | 3.29 | 3.12 | 2.99 | 2.89 | 2.80 | 2.73 | 2.66 | 2.61 | 2.56 | 2.52 | .37  | 2.27 | 2.20 | 2.11 | 2.06 | 2.02 | 1.97 | 1.94 |
|     | 0.005 | 8.83 | 6.07 | 4.98 | 4.37 | 3.99 | 3.71 | 3.51 | 3.35 | 3.22 | 3.12 | 3.03 | 2.95 | 2.89 | 2.83 | 2.78 | .60  | 2.48 | 2.40 | 2.30 | 2.23 | 2.18 | 2.12 | 2.09 |
| 42  | 0.05  | 4.07 | 3.22 | 2.83 | 2.59 | 2.44 | 2.32 | 2.24 | 2.17 | 2.11 | 2.06 | 2.03 | 1.99 | 1.96 | 1.94 | 1.91 | .83  | 1.77 | 1.73 | 1.68 | 1.65 | 1.62 | 1.59 | 1.57 |
|     | 0.01  | 7.28 | 5.15 | 4.29 | 3.80 | 3.49 | 3.27 | 3.10 | 2.97 | 2.86 | 2.78 | 2.70 | 2.64 | 2.59 | 2.54 | 2.50 | .34  | 2.25 | 2.18 | 2.09 | 2.03 | 1.99 | 1.94 | 1.91 |
|     | 0.005 | 8.78 | 6.03 | 4.94 | 4.34 | 3.95 | 3.68 | 3.48 | 3.32 | 3.19 | 3.09 | 3.00 | 2.92 | 2.86 | 2.80 | 2.75 | .57  | 2.45 | 2.37 | 2.26 | 2.20 | 2.15 | 2.09 | 2.06 |
| 44  | 0.05  | 4.06 | 3.21 | 2.82 | 2.58 | 2.43 | 2.31 | 2.23 | 2.16 | 2.10 | 2.05 | 2.01 | 1.98 | 1.95 | 1.92 | 1.90 | .81  | 1.76 | 1.72 | 1.67 | 1.63 | 1.61 | 1.58 | 1.56 |
|     | 0.01  | 7.25 | 5.12 | 4.26 | 3.78 | 3.47 | 3.24 | 3.08 | 2.95 | 2.84 | 2.75 | 2.68 | 2.62 | 2.56 | 2.52 | 2.47 | .32  | 2.22 | 2.15 | 2.07 | 2.01 | 1.97 | 1.92 | 1.89 |
|     | 0.005 | 8.74 | 5.99 | 4.91 | 4.31 | 3.92 | 3.65 | 3.45 | 3.29 | 3.16 | 3.06 | 2.97 | 2.89 | 2.83 | 2.77 | 2.72 | .54  | 2.42 | 2.34 | 2.24 | 2.17 | 2.12 | 2.06 | 2.03 |
| 46  | 0.05  | 4.05 | 3.20 | 2.81 | 2.57 | 2.42 | 2.30 | 2.22 | 2.15 | 2.09 | 2.04 | 2.00 | 1.97 | 1.94 | 1.91 | 1.89 | .80  | 1.75 | 1.71 | 1.65 | 1.62 | 1.60 | 1.57 | 1.55 |
|     | 0.01  | 7.22 | 5.10 | 4.24 | 3.76 | 3.44 | 3.22 | 3.06 | 2.93 | 2.82 | 2.73 | 2.66 | 2.60 | 2.54 | 2.50 | 2.45 | .30  | 2.20 | 2.13 | 2.04 | 1.99 | 1.95 | 1.90 | 1.86 |
|     | 0.005 | 8.70 | 5.96 | 4.88 | 4.28 | 3.90 | 3.62 | 3.42 | 3.26 | 3.14 | 3.03 | 2.94 | 2.87 | 2.80 | 2.75 | 2.70 | .51  | 2.40 | 2.32 | 2.21 | 2.14 | 2.10 | 2.04 | 2.00 |
| 48  | 0.05  | 4.04 | 3.19 | 2.80 | 2.57 | 2.41 | 2.29 | 2.21 | 2.14 | 2.08 | 2.03 | 1.99 | 1.96 | 1.93 | 1.90 | 1.88 | .79  | 1.74 | 1.70 | 1.64 | 1.61 | 1.59 | 1.56 | 1.54 |
|     | 0.01  | 7.19 | 5.08 | 4.22 | 3.74 | 3.43 | 3.20 | 3.04 | 2.91 | 2.80 | 2.71 | 2.64 | 2.28 | 2.53 | 2.48 | 2.44 | .28  | 2.18 | 2.12 | 2.02 | 1.97 | 1.93 | 1.88 | 1.84 |
|     | 0.005 | 8.66 | 5.93 | 4.85 | 4.25 | 3.87 | 3.60 | 3.40 | 3.24 | 3.11 | 3.01 | 2.92 | 2.85 | 1.78 | 2.72 | 2.67 | .49  | 2.37 | 2.29 | 2.19 | 2.12 | 2.07 | 2.01 | 1.97 |
| 50  | 0.05  | 4.03 | 3.18 | 2.79 | 2.56 | 2.40 | 2.29 | 2.20 | 2.13 | 2.07 | 2.03 | 1.99 | 1.95 | 1.92 | 1.89 | 1.87 | .78  | 1.73 | 1.69 | 1.63 | 1.60 | 1.58 | 1.54 | 1.52 |
|     | 0.01  | 7.17 | 5.06 | 4.20 | 3.72 | 3.41 | 3.19 | 3.02 | 2.89 | 2.78 | 2.70 | 2.63 | 2.56 | 2.51 | 2.46 | 2.42 | .27  | 2.17 | 2.10 | 2.01 | 1.95 | 1.91 | 1.86 | 1.82 |
|     | 0.005 | 8.63 | 5.90 | 4.83 | 4.23 | 3.85 | 3.58 | 3.38 | 3.22 | 3.09 | 2.99 | 2.90 | 2.82 | 2.76 | 2.70 | 2.65 | .47  | 2.35 | 2.27 | 2.16 | 2.10 | 2.05 | 1.99 | 1.95 |
| 55  | 0.05  | 4.02 | 3.16 | 2.77 | 2.54 | 2.38 | 2.27 | 2.18 | 2.11 | 2.06 | 2.01 | 1.97 | 1.93 | 1.90 | 1.88 | 85   | 1.76 | 1.71 | 1.67 | 1.61 | 1.58 | 1.55 | 1.52 | 1.50 |
|     | 0.01  | 7.12 | 5.01 | 4.16 | 3.68 | 3.37 | 3.15 | 2.98 | 2.85 | 2.75 | 2.66 | 2.59 | 2.53 | 2.47 | 2.42 | 38   | 2.23 | 2.13 | 2.06 | 1.97 | 1.91 | 1.87 | 1.82 | 1.78 |
|     | 0.005 | 8.55 | 5.84 | 4.77 | 4.18 | 3.80 | 3.53 | 3.33 | 3.17 | 3.05 | 2.94 | 2.85 | 2.78 | 2.71 | 2.66 | 61   | 2.42 | 2.31 | 2.23 | 2.12 | 2.05 | 2.00 | 1.94 | 1.90 |
| 60  | 0.05  | 4.00 | 3.15 | 2.76 | 2.53 | 2.37 | 2.25 | 2.17 | 2.10 | 2.04 | 1.99 | 1.95 | 1.92 | 1.89 | 1.86 | 84   | 1.75 | 1.69 | 1.65 | 1.59 | 1.56 | 1.53 | 1.50 | 1.48 |
|     | 0.01  | 7.08 | 4.98 | 4.13 | 3.65 | 3.34 | 3.12 | 2.95 | 2.82 | 2.72 | 2.63 | 2.56 | 2.50 | 2.44 | 2.39 | 35   | 2.20 | 2.10 | 2.03 | 1.94 | 1.88 | 1.84 | 1.78 | 1.75 |
|     | 0.005 | 8.49 | 5.79 | 4.73 | 4.14 | 3.76 | 3.49 | 3.29 | 3.13 | 3.01 | 2.90 | 2.82 | 2.74 | 2.68 | 2.62 | 57   | 2.39 | 2.27 | 2.19 | 2.08 | 2.01 | 1.96 | 1.90 | 1.86 |
| 65  | 0.05  | 3.99 | 3.14 | 2.75 | 2.51 | 2.36 | 2.24 | 2.15 | 2.08 | 2.03 | 1.98 | 1.94 | 1.90 | 1.87 | 1.85 | 82   | 1.73 | 1.68 | 1.63 | 1.58 | 1.54 | 1.52 | 1.49 | 1.46 |
|     | 0.01  | 7.04 | 4.95 | 4.10 | 3.62 | 3.31 | 3.09 | 2.93 | 2.80 | 2.69 | 2.61 | 2.53 | 2.47 | 2.42 | 2.37 | 33   | 2.17 | 2.07 | 2.00 | 1.91 | 1.85 | 1.81 | 1.75 | 1.72 |
|     | 0.005 | 8.44 | 5.75 | 4.69 | 4.11 | 3.73 | 3.46 | 3.26 | 3.10 | 2.98 | 2.87 | 2.79 | 2.71 | 2.65 | 2.59 | 54   | 2.36 | 2.24 | 2.16 | 2.05 | 1.98 | 1.93 | 1.87 | 1.83 |
| 70  | 0.05  | 3.98 | 3.13 | 2.74 | 2.50 | 2.35 | 2.23 | 2.14 | 2.07 | 2.02 | 1.97 | 1.93 | 1.89 | 1.86 | 1.84 | 81   | 1.72 | 1.66 | 1.62 | 1.57 | 1.53 | 1.50 | 1.47 | 1.45 |
|     | 0.01  | 7.01 | 4.92 | 4.07 | 3.60 | 3.29 | 3.07 | 2.91 | 2.78 | 2.67 | 2.59 | 2.51 | 2.45 | 2.40 | 2.35 | 31   | 2.15 | 2.05 | 1.98 | 1.89 | 1.83 | 1.78 | 1.73 | 1.70 |
|     | 0.005 | 8.40 | 5.72 | 4.66 | 4.08 | 3.70 | 3.43 | 3.23 | 3.08 | 2.95 | 2.85 | 2.76 | 2.68 | 2.62 | 2.56 | 51   | 2.33 | 2.21 | 2.13 | 2.02 | 1.95 | 1.90 | 1.84 | 1.80 |
| 80  | 0.05  | 3.96 | 3.11 | 2.72 | 2.49 | 2.33 | 2.21 | 2.13 | 2.06 | 2.00 | 1.95 | 1.91 | 1.88 | 1.84 | 1.82 | 79   | 1.70 | 1.64 | 1.60 | 1.54 | 1.51 | 1.48 | 1.45 | 1.43 |
|     | 0.01  | 6.96 | 4.88 | 4.04 | 3.56 | 3.26 | 3.04 | 2.87 | 2.74 | 2.64 | 2.55 | 2.48 | 2.42 | 2.36 | 2.31 | 27   | 2.12 | 2.01 | 1.94 | 1.85 | 1.79 | 1.75 | 1.69 | 1.65 |
|     | 0.005 | 8.33 | 5.67 | 4.61 | 4.03 | 3.65 | 3.39 | 3.19 | 3.03 | 2.91 | 2.80 | 2.72 | 2.64 | 2.58 | 2.52 | 47   | 2.29 | 2.17 | 2.08 | 1.97 | 1.90 | 1.85 | 1.79 | 1.75 |
| 90  | 0.05  | 3.95 | 3.10 | 2.71 | 2.47 | 2.32 | 2.20 | 2.11 | 2.04 | 1.99 | 1.94 | 1.90 | 1.86 | 1.83 | 1.80 | 78   | 1.69 | 1.63 | 1.59 | 1.53 | 1.49 | 1.46 | 1.43 | 1.41 |
|     | 0.01  | 6.93 | 4.85 | 4.01 | 3.53 | 3.23 | 3.01 | 2.84 | 2.72 | 2.61 | 2.52 | 2.45 | 2.39 | 2.33 | 2.29 | 24   | 2.09 | 1.99 | 1.92 | 1.82 | 1.76 | 1.72 | 1.66 | 1.62 |
|     | 0.005 | 8.28 | 5.62 | 4.57 | 3.99 | 3.62 | 3.35 | 3.15 | 3.00 | 2.87 | 2.77 | 2.68 | 2.61 | 2.54 | 2.49 | 44   | 2.25 | 2.13 | 2.05 | 1.94 | 1.87 | 1.82 | 1.75 | 1.71 |
| 100 | 0.05  | 3.94 | 3.09 | 2.70 | 2.46 | 2.31 | 2.19 | 2.10 | 2.03 | 1.97 | 1.93 | 1.89 | 1.85 | 1.82 | 1.79 | 77   | 1.68 | 1.62 | 1.57 | 1.52 | 1.48 | 1.45 | 1.41 | 1.39 |

|     |       |      |      |      |      |      |      |      |      |      |      |      |      |      |      |      |      |      |      |      |      |      |      |      |
|-----|-------|------|------|------|------|------|------|------|------|------|------|------|------|------|------|------|------|------|------|------|------|------|------|------|
|     | 0.01  | 6.90 | 4.82 | 3.98 | 3.51 | 3.21 | 2.99 | 2.82 | 2.69 | 2.59 | 2.50 | 2.43 | 2.37 | 2.31 | 2.27 | 22   | 2.07 | 1.97 | 1.89 | 1.80 | 1.74 | 1.69 | 1.63 | 1.60 |
|     | 0.005 | 8.24 | 5.59 | 4.54 | 3.96 | 3.59 | 3.33 | 3.13 | 2.97 | 2.85 | 2.74 | 2.66 | 2.58 | 2.52 | 2.46 | 41   | 2.23 | 2.11 | 2.02 | 1.91 | 1.84 | 1.79 | 1.72 | 1.68 |
| 120 | 0.05  | 3.92 | 3.07 | 2.68 | 2.45 | 2.29 | 2.18 | 2.09 | 2.02 | 1.96 | 1.91 | 1.87 | 1.83 | 1.80 | 1.78 | 75   | 1.66 | 1.60 | 1.55 | 1.50 | 1.46 | 1.43 | 1.39 | 1.37 |
|     | 0.01  | 6.85 | 4.79 | 3.95 | 3.48 | 3.17 | 2.96 | 2.79 | 2.66 | 2.56 | 2.47 | 2.40 | 2.34 | 2.28 | 2.23 | 19   | 2.03 | 1.93 | 1.86 | 1.76 | 1.70 | 1.66 | 1.60 | 1.56 |
|     | 0.005 | 8.18 | 5.54 | 4.50 | 3.92 | 3.55 | 3.28 | 3.09 | 2.93 | 2.81 | 2.71 | 2.62 | 2.54 | 2.48 | 2.42 | 37   | 2.19 | 2.07 | 1.98 | 1.87 | 1.80 | 1.75 | 1.68 | 1.64 |
| 160 | 0.05  | 3.90 | 3.05 | 2.66 | 2.43 | 2.27 | 2.16 | 2.07 | 2.00 | 1.94 | 1.89 | 1.85 | 1.81 | 1.78 | 1.75 | 73   | 1.64 | 1.57 | 1.53 | 1.47 | 1.43 | 1.40 | 1.36 | 1.34 |
|     | 0.01  | 6.80 | 4.74 | 3.91 | 3.44 | 3.13 | 2.92 | 2.75 | 2.62 | 2.52 | 2.43 | 2.36 | 2.30 | 2.24 | 2.20 | 15   | 1.99 | 1.89 | 1.82 | 1.72 | 1.66 | 1.61 | 1.55 | 1.51 |
|     | 0.005 | 8.10 | 5.48 | 4.44 | 3.87 | 3.50 | 3.24 | 3.04 | 2.88 | 2.76 | 2.66 | 2.57 | 2.50 | 2.43 | 2.38 | 33   | 2.14 | 2.02 | 1.93 | 1.82 | 1.75 | 1.69 | 1.62 | 1.58 |
| 200 | 0.05  | 3.89 | 3.04 | 2.65 | 2.42 | 2.26 | 2.14 | 2.06 | 1.98 | 1.93 | 1.88 | 1.84 | 1.80 | 1.77 | 1.74 | 72   | 1.62 | 1.56 | 1.52 | 1.46 | 1.41 | 1.39 | 1.35 | 1.32 |
|     | 0.01  | 6.76 | 4.71 | 3.88 | 3.41 | 3.11 | 2.89 | 2.73 | 2.60 | 2.50 | 2.41 | 2.34 | 2.27 | 2.22 | 2.17 | 13   | 1.97 | 1.87 | 1.79 | 1.69 | 1.63 | 1.58 | 1.52 | 1.48 |
|     | 0.005 | 8.06 | 5.44 | 4.41 | 3.84 | 3.47 | 3.21 | 3.01 | 2.86 | 2.73 | 2.63 | 2.54 | 2.47 | 2.40 | 2.35 | 30   | 2.11 | 1.99 | 1.91 | 1.79 | 1.71 | 1.66 | 1.59 | 1.54 |
| 400 | 0.05  | 3.86 | 3.02 | 2.63 | 2.39 | 2.24 | 2.12 | 2.03 | 1.96 | 1.90 | 1.85 | 1.81 | 1.78 | 1.74 | 1.72 | 1.69 | 1.60 | 1.53 | 1.49 | 1.42 | 1.38 | 1.35 | 1.31 | 1.28 |
|     | 0.01  | 6.70 | 4.66 | 3.83 | 3.37 | 3.06 | 2.85 | 2.68 | 2.56 | 2.45 | 2.37 | 2.29 | 2.23 | 2.17 | 2.13 | 2.08 | 1.92 | 1.82 | 1.75 | 1.64 | 1.58 | 1.53 | 1.46 | 1.42 |
|     | 0.005 | 7.97 | 5.37 | 4.34 | 3.78 | 3.41 | 3.15 | 2.95 | 2.80 | 2.68 | 2.57 | 2.49 | 2.41 | 2.35 | 2.29 | 2.24 | 2.06 | 1.93 | 1.85 | 1.73 | 1.65 | 1.60 | 1.52 | 1.47 |
| ∞   | 0.05  | 3.84 | 3.00 | 2.60 | 2.37 | 2.21 | 2.10 | 2.01 | 1.94 | 1.88 | 1.83 | 1.79 | 1.75 | 1.72 | 1.69 | 1.67 | 1.57 | 1.51 | 1.46 | 1.39 | 1.35 | 1.32 | 1.27 | 1.24 |
|     | 0.01  | 6.63 | 4.61 | 3.78 | 3.32 | 3.02 | 2.80 | 2.64 | 2.51 | 2.41 | 2.32 | 2.25 | 2.18 | 2.13 | 2.08 | 2.04 | 1.88 | 1.77 | 1.70 | 1.59 | 1.52 | 1.47 | 1.40 | 1.36 |
|     | 0.005 | 7.88 | 5.30 | 4.28 | 3.72 | 3.35 | 3.09 | 2.90 | 2.74 | 2.62 | 2.52 | 2.43 | 2.36 | 2.29 | 2.24 | 2.19 | 2.00 | 1.88 | 1.79 | 1.67 | 1.59 | 1.53 | 1.45 | 1.40 |

## 5 Critical values of the $\chi^2$ -distribution

Table 5 provides critical values of the  $\chi^2$ -distribution to be used in conjunction with calculation of a  $\chi$ -value. To use the table, follow the steps below:

- 1 Look for the row with the appropriate number of degrees of freedom ( $df$ ).
- 2 Look across the columns until you find the largest value of  $\chi^2$  in that row which is smaller than the value obtained from calculation. The value at the very top of that column is the  $p$ -value that you should report.

*Note:* The columns in the table represent the most commonly used alpha levels.

For example, if the calculated  $\chi^2$  is 16.41, with 7 degrees of freedom, then to find the  $p$ -value go to the row with  $df = 7$  and look along this to find the largest value that 16.41 exceeds. In this case the value is 14.0671 and this corresponds to a  $p$ -value of .05. Full results of this  $\chi^2$ -test could then be reported as  $\chi^2(7) = 16.41, p < .05$ .

The relevant lines in the table are reproduced below, with relevant numbers in boxes:

| $df$ | 0.99   | 0.95   | 0.9    | 0.8    | Area beyond $\chi^2$ |         | 0.05    | 0.01    | 0.005   | 0.001   |
|------|--------|--------|--------|--------|----------------------|---------|---------|---------|---------|---------|
| 7    | 1.2390 | 2.1673 | 2.8331 | 3.8223 | 9.8032               | 12.0170 | 14.0671 | 18.4753 | 20.2777 | 24.3213 |

Table 5 Critical values of the  $\chi^2$ -distribution (Smithson, 2000, pp. 430–431)

| $df$ | 0.99   | 0.95    | 0.9     | 0.8     | Area beyond $\chi^2$ |         | 0.05    | 0.01    | 0.005   | 0.001   |
|------|--------|---------|---------|---------|----------------------|---------|---------|---------|---------|---------|
| 1    | 0.0002 | 0.0039  | 0.0158  | 0.0642  | 1.6424               | 2.7055  | 3.8415  | 6.6349  | 7.8794  | 10.8274 |
| 2    | 0.0201 | 0.1026  | 0.2107  | 0.4463  | 3.2189               | 4.6052  | 5.9915  | 9.2104  | 10.5965 | 13.8150 |
| 3    | 0.1148 | 0.3518  | 0.5844  | 1.0052  | 4.6416               | 6.2514  | 7.8147  | 11.3449 | 12.8381 | 16.2260 |
| 4    | 0.2971 | 0.7107  | 1.0636  | 1.6488  | 5.9886               | 7.7794  | 9.4877  | 13.2767 | 14.8602 | 18.4662 |
| 5    | 0.5543 | 1.1455  | 1.6103  | 2.3425  | 7.2893               | 9.2363  | 11.0705 | 15.0863 | 16.7496 | 20.5147 |
| 6    | 0.8721 | 1.6354  | 2.2041  | 3.0701  | 8.5581               | 10.6446 | 12.5916 | 16.8119 | 18.5475 | 22.4575 |
| 7    | 1.2390 | 2.1673  | 2.8331  | 3.8223  | 9.8032               | 12.0170 | 14.0671 | 18.4753 | 20.2777 | 24.3213 |
| 8    | 1.6465 | 2.7326  | 3.4895  | 4.5936  | 11.0301              | 13.3616 | 15.5073 | 20.0902 | 21.9549 | 26.1239 |
| 9    | 2.0879 | 3.3251  | 4.1682  | 5.3801  | 12.2421              | 14.6837 | 16.9190 | 21.6660 | 23.5893 | 27.8767 |
| 10   | 2.5582 | 3.9403  | 4.8652  | 6.1791  | 13.4420              | 15.9872 | 18.3070 | 23.2093 | 25.1881 | 29.5879 |
| 11   | 3.0535 | 4.5748  | 5.5778  | 6.9887  | 14.6314              | 17.2750 | 19.6752 | 24.7250 | 26.7569 | 31.2635 |
| 12   | 3.5706 | 5.2260  | 6.3038  | 7.8073  | 15.8120              | 18.5493 | 21.0261 | 26.2170 | 28.2997 | 32.9092 |
| 13   | 4.1069 | 5.8919  | 7.0415  | 8.6339  | 16.9848              | 19.8119 | 22.3620 | 27.6882 | 29.8193 | 34.5274 |
| 14   | 4.6604 | 6.5706  | 7.7895  | 9.4673  | 18.1508              | 21.0641 | 23.6848 | 29.1412 | 31.3194 | 36.1239 |
| 15   | 5.2294 | 7.2609  | 8.5468  | 10.3070 | 19.3107              | 22.3071 | 24.9958 | 30.5780 | 32.8015 | 37.6978 |
| 16   | 5.8122 | 7.9616  | 9.3122  | 11.1521 | 20.4651              | 23.5418 | 26.2962 | 31.9999 | 34.2671 | 39.2518 |
| 17   | 6.4077 | 8.6718  | 10.0852 | 12.0023 | 21.6146              | 24.7690 | 27.5871 | 33.4087 | 35.7184 | 40.7911 |
| 18   | 7.0149 | 9.3904  | 10.8649 | 12.8570 | 22.7595              | 25.9894 | 28.8693 | 34.8052 | 37.1564 | 42.3119 |
| 19   | 7.6327 | 10.1170 | 11.6509 | 13.7158 | 23.9004              | 27.2036 | 30.1435 | 36.1908 | 38.5821 | 43.8194 |
| 20   | 8.2604 | 10.8508 | 12.4426 | 14.5784 | 25.0375              | 28.4120 | 31.4104 | 37.5663 | 39.9969 | 45.3142 |
| 21   | 8.8972 | 11.5913 | 13.2396 | 15.4446 | 26.1711              | 29.6151 | 32.6706 | 38.9322 | 41.4009 | 46.7963 |

|    |         |         |         |         |         |         |         |         |         |         |
|----|---------|---------|---------|---------|---------|---------|---------|---------|---------|---------|
| 22 | 9.5425  | 12.3380 | 14.0415 | 16.3140 | 27.3015 | 30.8133 | 33.9245 | 40.2894 | 42.7957 | 48.2676 |
| 23 | 10.1957 | 13.0905 | 14.8480 | 17.1865 | 28.4288 | 32.0069 | 35.1725 | 41.6383 | 44.1814 | 49.7276 |
| 24 | 10.8563 | 13.8484 | 15.6587 | 18.0618 | 29.5533 | 33.1962 | 36.4150 | 42.9798 | 45.5584 | 51.1790 |
| 25 | 11.5240 | 14.6114 | 16.4734 | 18.9397 | 30.6752 | 34.3816 | 37.6525 | 44.3140 | 46.9280 | 52.6187 |
| 26 | 12.1982 | 15.3792 | 17.2919 | 19.8202 | 31.7946 | 35.5632 | 38.8851 | 45.6416 | 48.2898 | 54.0511 |
| 27 | 12.8785 | 16.1514 | 18.1139 | 20.7030 | 32.9117 | 36.7412 | 40.1133 | 46.9628 | 49.6450 | 55.4751 |
| 28 | 13.5647 | 16.9279 | 18.9392 | 21.5880 | 34.0266 | 37.9159 | 41.3372 | 48.2782 | 50.9936 | 56.8918 |
| 29 | 14.2564 | 17.7084 | 19.7677 | 22.4751 | 35.1394 | 39.0875 | 42.5569 | 49.5878 | 52.3355 | 58.3006 |
| 30 | 14.9535 | 18.4927 | 20.5992 | 23.3641 | 36.2502 | 40.2560 | 43.7730 | 50.8922 | 53.6719 | 59.7022 |
| 31 | 15.6555 | 19.2806 | 21.4336 | 24.2551 | 37.3591 | 41.4217 | 44.9853 | 52.1914 | 55.0025 | 61.0980 |
| 32 | 16.3622 | 20.0719 | 22.2706 | 25.1478 | 38.4663 | 42.5847 | 46.1942 | 53.4857 | 56.3280 | 62.4873 |
| 33 | 17.0735 | 20.8665 | 23.1102 | 26.0422 | 39.5718 | 43.7452 | 47.3999 | 54.7754 | 57.6483 | 63.8694 |
| 34 | 17.7891 | 21.6643 | 23.9522 | 26.9383 | 40.6756 | 44.9032 | 48.6024 | 56.0609 | 58.9637 | 65.2471 |
| 35 | 18.5089 | 22.4650 | 24.7966 | 27.8359 | 41.7780 | 46.0588 | 49.8018 | 57.3420 | 60.2746 | 66.6192 |
| 36 | 19.2326 | 23.2686 | 25.6433 | 28.7350 | 42.8788 | 47.2122 | 50.9985 | 58.6192 | 61.5811 | 67.9850 |
| 37 | 19.9603 | 24.0749 | 26.4921 | 29.6355 | 43.9782 | 48.3634 | 52.1923 | 59.8926 | 62.8832 | 69.3476 |
| 38 | 20.6914 | 24.8839 | 27.3430 | 30.5373 | 45.0763 | 49.5126 | 53.3835 | 61.1620 | 64.1812 | 70.7039 |
| 39 | 21.4261 | 25.6954 | 28.1958 | 31.4405 | 46.1730 | 50.6598 | 54.5722 | 62.4281 | 65.4753 | 72.0550 |
| 40 | 22.1642 | 26.5093 | 29.0505 | 32.3449 | 47.2685 | 51.8050 | 55.7585 | 63.6908 | 66.7660 | 73.4029 |
| 41 | 22.9056 | 27.3256 | 29.9071 | 33.2506 | 48.3628 | 52.9485 | 56.9424 | 64.9500 | 68.0526 | 74.7441 |
| 42 | 23.6501 | 28.1440 | 30.7654 | 34.1574 | 49.4560 | 54.0902 | 58.1240 | 66.2063 | 69.3360 | 76.0842 |
| 43 | 24.3976 | 28.9647 | 31.6255 | 35.0653 | 50.5480 | 55.2302 | 59.3035 | 67.4593 | 70.6157 | 77.4184 |
| 44 | 25.1480 | 29.7875 | 32.4871 | 35.9744 | 51.6389 | 56.3685 | 60.4809 | 68.7096 | 71.8923 | 78.7487 |
| 45 | 25.9012 | 30.6123 | 33.3504 | 36.8844 | 52.7288 | 57.5053 | 61.6562 | 69.9569 | 73.1660 | 80.0776 |
| 46 | 26.6572 | 31.4390 | 34.2152 | 37.7955 | 53.8177 | 58.6405 | 62.8296 | 71.2015 | 74.4367 | 81.3998 |
| 47 | 27.4158 | 32.2676 | 35.0814 | 38.7075 | 54.9056 | 59.7743 | 64.0011 | 72.4432 | 75.7039 | 82.7198 |
| 48 | 28.1770 | 33.0981 | 35.9491 | 39.6205 | 55.9926 | 60.9066 | 65.1708 | 73.6826 | 76.9689 | 84.0368 |
| 49 | 28.9406 | 33.9303 | 36.8182 | 40.5344 | 57.0786 | 62.0375 | 66.3387 | 74.9194 | 78.2306 | 85.3499 |
| 50 | 29.7067 | 34.7642 | 37.6886 | 41.4492 | 58.1638 | 63.1671 | 67.5048 | 76.1538 | 79.4898 | 86.6603 |
